# Supplementary material for: Identifying Potential Cropland Losses When Conserving 30% and 50% Earth with Different Approaches and Spatial Scales
Source: MDPI journal article supplement (doi:10.3390/land10070704), 2021-07-04
Supplement: s1 [file s1]

# Identifying potential cropland losses when conserving 30% and 50%

## Earth with different approaches and spatial scales

Jianqiao Zhao <sup>1,2,\*\*</sup>, Yue Cao <sup>3,4,\*\*</sup>, Le Yu <sup>1,2,\*</sup>, Xiaoxuan Liu <sup>1,2</sup>, Yichuan Shi <sup>5</sup>, Xiaoping Liu <sup>6,7</sup>, Rui Yang <sup>3,4</sup>, Peng Gong <sup>1,2,,8</sup>

<sup>1</sup> Ministry of Education Key Laboratory for Earth System Modeling, Department of Earth System Science, Tsinghua University, Beijing 100084, China

<sup>2</sup> Ministry of Education Ecological Field Station for East Asian Migratory Birds, Beijing 100084, China

<sup>3</sup> Institute for National Parks, Tsinghua University, Beijing 100084, China

<sup>4</sup> Department of Landscape Architecture, School of Architecture, Tsinghua University, Beijing 100084, China

<sup>5</sup> Conservation International, Beijing 100027, China

<sup>6</sup> Guangdong Key Laboratory for Urbanization and Geo-simulation, School of Geography and Planning, Sun Yat-sen University, Guangzhou 510275, China

<sup>7</sup> Southern Marine Science and Engineering Guangdong Laboratory (Zhuhai), Zhuhai 519082, China

<sup>8</sup> Department of Geography and Department of Earth Sciences, University of Hong Kong, Hong Kong, China

\*Correspondence: leyu@tsinghua.edu.cn

\*\*Contributed equally.

# Supplementary Tables

## Supplementary Table 1

The sum of global total calorie interpolated under different future scenarios. Before interpolation, the sum of global total calorie is 9.45315E+15.

|             | 2030        | 2050        |
|-------------|-------------|-------------|
| SSP1-RCP1.9 | 1.20332E+16 | 1.20031E+16 |
| SSP1-RCP2.6 | 1.20415E+16 | 1.20124E+16 |
| SSP2-RCP4.5 | 1.20950E+16 | 1.20505E+16 |
| SSP3-RCP7.0 | 1.20835E+16 | 1.20336E+16 |
| SSP4-RCP3.4 | 1.20533E+16 | 1.19965E+16 |
| SSP4-RCP6.0 | 1.21074E+16 | 1.20291E+16 |
| SSP5-RCP3.4 | 1.21073E+16 | 1.20536E+16 |
| SSP5-RCP8.5 | 1.21027E+16 | 1.20437E+16 |

## Supplementary Table 2

Percentage of cropland losses for countries under nature-only approach in 2030 at biome scale(%)

|    | country                | ISO3 | SSP1_RCP19 | SSP1_RCP26 | SSP2_RCP45 | SSP3_RCP70 | SSP4_RCP34 | SSP4_RCP60 | SSP5_RCP34 | SSP5_RCP85 | max   | min   | mean  |
|----|------------------------|------|------------|------------|------------|------------|------------|------------|------------|------------|-------|-------|-------|
| 1  | Afghanistan            | AFG  | 0          | 0          | 0          | 0          | 0          | 0          | 0          | 0          | 0     | 0     | 0     |
| 2  | Aland                  | ALA  | 3.09       | 2.86       | 2.83       | 9.16       | 9.15       | 7.39       | 8.21       | 9.19       | 9.19  | 2.83  | 6.49  |
| 3  | Albania                | ALB  | 0          | 0          | 0.02       | 0.11       | 0.01       | 0.04       | 0.1        | 0.12       | 0.12  | 0     | 0.05  |
| 4  | Angola                 | AGO  | 0          | 0          | 0          | 0          | 0          | 0          | 0          | 0          | 0     | 0     | 0     |
| 5  | Antigua and Barbuda    | ATG  | 0          | 0          | 48.29      | 8.81       | 11.28      | 33.99      | 48.29      | 39.9       | 48.29 | 0     | 23.82 |
| 6  | Argentina              | ARG  | 0          | 0          | 0.24       | 0          | 0          | 0.36       | 1.47       | 1.21       | 1.47  | 0     | 0.41  |
| 7  | Armenia                | ARM  | 0          | 0          | 0.65       | 0.09       | 0.16       | 0.53       | 1.21       | 1.07       | 1.21  | 0     | 0.46  |
| 8  | Australia              | AUS  | 0.57       | 0          | 2.92       | 2.5        | 2.32       | 3.37       | 2.54       | 2.43       | 3.37  | 0     | 2.08  |
| 9  | Azerbaijan             | AZE  | 0.01       | 0          | 0.8        | 0.39       | 0.48       | 0.52       | 1.12       | 1.14       | 1.14  | 0     | 0.56  |
| 10 | Belarus                | BLR  | 0          | 0          | 0.39       | 0.11       | 0.07       | 0.17       | 0.62       | 0.58       | 0.62  | 0     | 0.24  |
| 11 | Belgium                | BEL  | 0          | 0          | 0          | 0          | 0          | 0          | 0          | 0          | 0     | 0     | 0     |
| 12 | Bhutan                 | BTN  | 4.65       | 0          | 21.38      | 6.69       | 1.39       | 15.62      | 45.98      | 28.65      | 45.98 | 0     | 15.55 |
| 13 | Bolivia                | BOL  | 12.88      | 10.44      | 21.3       | 18.46      | 18.28      | 20.54      | 18.91      | 18.19      | 21.3  | 10.44 | 17.37 |
| 14 | Bosnia and Herzegovina | BIH  | 0.17       | 0          | 0.97       | 1.01       | 0.27       | 0.6        | 1.2        | 1.16       | 1.2   | 0     | 0.67  |
| 15 | Brazil                 | BRA  | 1.09       | 1.01       | 1.44       | 1.28       | 1.22       | 1.35       | 1.43       | 1.42       | 1.44  | 1.01  | 1.28  |
| 16 | Bulgaria               | BGR  | 0          | 0          | 0.32       | 0.11       | 0.22       | 0.09       | 0.41       | 0.44       | 0.44  | 0     | 0.2   |
| 17 | Cambodia               | KHM  | 8.03       | 7.26       | 8.06       | 7.66       | 7.91       | 8.09       | 7.6        | 7.96       | 8.09  | 7.26  | 7.82  |
| 18 | Canada                 | CAN  | 0.01       | 0          | 0.42       | 0.53       | 0.17       | 0.4        | 0.57       | 0.53       | 0.57  | 0     | 0.33  |
| 19 | Cape Verde             | CPV  | 0.25       | 1.31       | 0.22       | 0.21       | 0.37       | 0.66       | 0.16       | 0.27       | 1.31  | 0.16  | 0.43  |
| 20 | Chile                  | CHL  | 1.36       | 0.01       | 5.71       | 2.92       | 3.28       | 3.36       | 5.1        | 5.27       | 5.71  | 0.01  | 3.38  |
| 21 | China                  | CHN  | 0          | 0          | 0.31       | 0.12       | 0.12       | 0.24       | 0.42       | 0.36       | 0.42  | 0     | 0.2   |

|    |                |     |      |      |       |       |       |       |       |       |       |      |       |
|----|----------------|-----|------|------|-------|-------|-------|-------|-------|-------|-------|------|-------|
| 22 | Colombia       | COL | 4.04 | 3.82 | 4.68  | 4.53  | 4.59  | 4.59  | 4.71  | 4.28  | 4.71  | 3.82 | 4.4   |
| 23 | Croatia        | HRV | 0    | 0    | 0     | 0     | 0     | 0     | 0.01  | 0     | 0.01  | 0    | 0     |
| 24 | Czech Republic | CZE | 0    | 0    | 0     | 0     | 0     | 0     | 0     | 0     | 0     | 0    | 0     |
| 25 | East Timor     | TLS | 1.69 | 1.45 | 7.05  | 3.51  | 3.44  | 4.66  | 4.62  | 4.31  | 7.05  | 1.45 | 3.84  |
| 26 | Ecuador        | ECU | 4.17 | 4.41 | 4.22  | 5.24  | 4.67  | 5.01  | 4.44  | 4.89  | 5.24  | 4.17 | 4.63  |
| 27 | Estonia        | EST | 0    | 0    | 3.52  | 0.5   | 0.19  | 0.96  | 5.52  | 5     | 5.52  | 0    | 1.96  |
| 28 | Faroe Islands  | FRO | 0    | 0    | 0     | 0     | 0     | 0     | 0     | 100   | 100   | 0    | 12.5  |
| 29 | France         | FRA | 0    | 0    | 0.13  | 0.09  | 0.07  | 0.09  | 0.15  | 0.15  | 0.15  | 0    | 0.09  |
| 30 | Georgia        | GEO | 0.06 | 0    | 1.78  | 0.95  | 0.97  | 1.21  | 2.15  | 2.25  | 2.25  | 0    | 1.17  |
| 31 | Greece         | GRC | 0    | 0    | 0     | 0     | 0     | 0     | 0     | 0     | 0     | 0    | 0     |
| 32 | Honduras       | HND | 0    | 0.01 | 0.01  | 0.01  | 0.01  | 0.01  | 0     | 0     | 0.01  | 0    | 0.01  |
| 33 | India          | IND | 0    | 0    | 0     | 0     | 0     | 0.01  | 0.01  | 0.01  | 0.01  | 0    | 0     |
| 34 | Indonesia      | IDN | 0.02 | 0.02 | 0.06  | 0.03  | 0.04  | 0.07  | 0.07  | 0.05  | 0.07  | 0.02 | 0.04  |
| 35 | Iran           | IRN | 0    | 0    | 0.51  | 0.09  | 0.08  | 0.2   | 0.59  | 0.43  | 0.59  | 0    | 0.24  |
| 36 | Iraq           | IRQ | 2.52 | 0    | 12.19 | 10.52 | 10.21 | 11.36 | 19.73 | 17.92 | 19.73 | 0    | 10.56 |
| 37 | Ireland        | IRL | 0    | 0    | 0.33  | 0.02  | 0.03  | 0.02  | 4.93  | 3.88  | 4.93  | 0    | 1.15  |
| 38 | Italy          | ITA | 0    | 0    | 0.01  | 0.02  | 0.02  | 0.01  | 0.01  | 0.01  | 0.02  | 0    | 0.01  |
| 39 | Japan          | JPN | 0.01 | 0    | 0.59  | 0.3   | 0.38  | 0.42  | 0.73  | 0.71  | 0.73  | 0    | 0.39  |
| 40 | Kazakhstan     | KAZ | 0    | 0    | 2.51  | 0     | 0     | 3.86  | 8.54  | 6.72  | 8.54  | 0    | 2.7   |
| 41 | Kyrgyzstan     | KGZ | 0    | 0    | 0     | 0     | 0     | 0     | 0.47  | 0.17  | 0.47  | 0    | 0.08  |
| 42 | Laos           | LAO | 5.41 | 4.57 | 7.57  | 6.22  | 6.18  | 6.7   | 6.52  | 6.06  | 7.57  | 4.57 | 6.15  |
| 43 | Latvia         | LVA | 0.01 | 0    | 4.3   | 0.84  | 0.9   | 1.17  | 6.4   | 5.46  | 6.4   | 0    | 2.38  |
| 44 | Lithuania      | LTU | 0    | 0    | 0.46  | 0.1   | 0     | 0.16  | 0.85  | 0.81  | 0.85  | 0    | 0.3   |
| 45 | Macedonia      | MKD | 0    | 0    | 0.08  | 0.07  | 0     | 0.11  | 0.17  | 0.25  | 0.25  | 0    | 0.09  |
| 46 | Madagascar     | MDG | 7.74 | 6.15 | 12.02 | 10.46 | 12.21 | 13.13 | 10.63 | 9.13  | 13.13 | 6.15 | 10.19 |
| 47 | Mexico         | MEX | 0.69 | 0.55 | 1.15  | 0.89  | 1.08  | 1.07  | 0.83  | 0.6   | 1.15  | 0.55 | 0.86  |

[illegible]

|    |           |     |       |       |       |       |      |      |       |       |       |       |       |
|----|-----------|-----|-------|-------|-------|-------|------|------|-------|-------|-------|-------|-------|
| 74 | Venezuela | VEN | 18.61 | 18.49 | 21.13 | 18.06 | 19.6 | 19.3 | 20.21 | 19.25 | 21.13 | 18.06 | 19.33 |
| 75 | Vietnam   | VNM | 1.35  | 1.03  | 1.87  | 1.53  | 1.68 | 1.7  | 1.67  | 1.63  | 1.87  | 1.03  | 1.56  |
| 76 | Zambia    | ZMB | 5.99  | 6.29  | 5.93  | 5.39  | 5.26 | 5.29 | 6.09  | 5.79  | 6.29  | 5.26  | 5.75  |

## Supplementary Table 3

Percentage of cropland losses for countries under nature-only approach in 2050 at biome scale(%)

|    | country                | ISO3 | SSP1_RCP19 | SSP1_RCP26 | SSP2_RCP45 | SSP3_RCP70 | SSP4_RCP34 | SSP4_RCP60 | SSP5_RCP34 | SSP5_RCP85 | max    | min   | mean  |
|----|------------------------|------|------------|------------|------------|------------|------------|------------|------------|------------|--------|-------|-------|
| 1  | Afghanistan            | AFG  | 0.06       | 0.09       | 0.08       | 0.08       | 0.04       | 0.04       | 0.08       | 0.08       | 0.09   | 0.04  | 0.07  |
| 2  | Aland                  | ALA  | 52.92      | 100.00     | 59.55      | 55.34      | 59.02      | 55.80      | 54.51      | 66.05      | 100.00 | 52.92 | 62.90 |
| 3  | Albania                | ALB  | 25.74      | 27.60      | 27.58      | 26.31      | 18.96      | 25.62      | 24.31      | 23.18      | 27.60  | 18.96 | 24.91 |
| 4  | Algeria                | DZA  | 13.61      | 13.28      | 14.90      | 13.66      | 13.19      | 13.34      | 8.48       | 7.67       | 14.90  | 7.67  | 12.27 |
| 5  | Angola                 | AGO  | 0.34       | 0.44       | 0.39       | 0.39       | 0.46       | 0.50       | 0.38       | 0.37       | 0.50   | 0.34  | 0.41  |
| 6  | Antigua and Barbuda    | ATG  | 1.04       | 1.00       | 8.52       | 1.04       | 2.42       | 3.23       | 48.29      | 11.74      | 48.29  | 1.00  | 9.66  |
| 7  | Argentina              | ARG  | 6.90       | 6.11       | 9.52       | 10.29      | 7.48       | 9.28       | 9.02       | 8.99       | 10.29  | 6.11  | 8.45  |
| 8  | Armenia                | ARM  | 19.33      | 21.20      | 22.54      | 23.60      | 17.50      | 24.82      | 29.68      | 31.01      | 31.01  | 17.50 | 23.71 |
| 9  | Australia              | AUS  | 27.19      | 25.34      | 27.98      | 28.58      | 24.07      | 29.91      | 25.64      | 24.40      | 29.91  | 24.07 | 26.64 |
| 10 | Austria                | AUT  | 0.10       | 0.12       | 0.16       | 0.10       | 0.20       | 0.14       | 0.25       | 0.25       | 0.25   | 0.10  | 0.17  |
| 11 | Azerbaijan             | AZE  | 7.11       | 8.47       | 8.44       | 8.32       | 8.07       | 8.32       | 9.05       | 9.62       | 9.62   | 7.11  | 8.43  |
| 12 | Belarus                | BLR  | 62.23      | 62.17      | 65.40      | 63.30      | 63.07      | 64.82      | 67.57      | 67.55      | 67.57  | 62.17 | 64.51 |
| 13 | Belgium                | BEL  | 0.21       | 0.22       | 0.15       | 0.13       | 0.39       | 0.28       | 0.13       | 0.08       | 0.39   | 0.08  | 0.20  |
| 14 | Bhutan                 | BTN  | 31.60      | 36.69      | 36.43      | 35.53      | 48.23      | 30.20      | 42.38      | 30.42      | 48.23  | 30.20 | 36.43 |
| 15 | Bolivia                | BOL  | 55.68      | 56.36      | 50.24      | 53.20      | 54.60      | 51.25      | 48.83      | 50.02      | 56.36  | 48.83 | 52.52 |
| 16 | Bosnia and Herzegovina | BIH  | 23.95      | 25.30      | 24.44      | 23.22      | 19.07      | 23.50      | 24.83      | 24.71      | 25.30  | 19.07 | 23.63 |

|    |                                  |     |        |       |       |       |        |       |       |       |        |       |       |
|----|----------------------------------|-----|--------|-------|-------|-------|--------|-------|-------|-------|--------|-------|-------|
| 17 | Brazil                           | BRA | 3.11   | 3.09  | 3.15  | 3.15  | 2.29   | 3.05  | 3.30  | 3.32  | 3.32   | 2.29  | 3.06  |
| 18 | Brunei                           | BRN | 0.03   | 0.04  | 0.04  | 0.03  | 0.04   | 0.04  | 0.22  | 0.03  | 0.22   | 0.03  | 0.06  |
| 19 | Bulgaria                         | BGR | 4.93   | 4.66  | 6.01  | 3.59  | 6.62   | 5.18  | 6.61  | 6.48  | 6.62   | 3.59  | 5.51  |
| 20 | Cambodia                         | KHM | 37.02  | 34.84 | 36.07 | 33.11 | 37.82  | 34.30 | 33.31 | 33.92 | 37.82  | 33.11 | 35.05 |
| 21 | Canada                           | CAN | 1.99   | 2.54  | 4.85  | 5.75  | 0.54   | 3.68  | 4.81  | 4.78  | 5.75   | 0.54  | 3.62  |
| 22 | Cape Verde                       | CPV | 25.26  | 25.84 | 26.32 | 41.18 | 34.25  | 35.93 | 33.16 | 32.72 | 41.18  | 25.26 | 31.83 |
| 23 | Chile                            | CHL | 18.24  | 19.33 | 26.75 | 23.39 | 22.97  | 24.54 | 25.79 | 23.56 | 26.75  | 18.24 | 23.07 |
| 24 | China                            | CHN | 5.06   | 4.57  | 5.88  | 4.49  | 6.48   | 5.47  | 6.26  | 6.35  | 6.48   | 4.49  | 5.57  |
| 25 | Colombia                         | COL | 19.53  | 20.09 | 18.63 | 19.38 | 19.20  | 19.56 | 19.26 | 19.49 | 20.09  | 18.63 | 19.39 |
| 26 | Costa Rica                       | CRI | 0.01   | 0.03  | 0.03  | 0.02  | 0.03   | 0.03  | 0.02  | 0.01  | 0.03   | 0.01  | 0.02  |
| 27 | Croatia                          | HRV | 9.78   | 10.07 | 10.14 | 9.03  | 6.90   | 9.67  | 11.01 | 11.12 | 11.12  | 6.90  | 9.71  |
| 28 | Cuba                             | CUB | 3.17   | 2.91  | 3.56  | 3.47  | 3.47   | 3.51  | 3.25  | 3.13  | 3.56   | 2.91  | 3.31  |
| 29 | Cyprus                           | CYP | 100.00 | 89.48 | 69.22 | 86.30 | 79.21  | 70.69 | 72.84 | 72.26 | 100.00 | 69.22 | 80.00 |
| 30 | Czech Republic                   | CZE | 0.71   | 0.65  | 0.99  | 0.81  | 1.04   | 0.88  | 0.88  | 0.86  | 1.04   | 0.65  | 0.85  |
| 31 | Democratic Republic of the Congo | COD | 0.00   | 0.01  | 0.01  | 0.02  | 0.01   | 0.01  | 0.01  | 0.01  | 0.02   | 0.00  | 0.01  |
| 32 | Denmark                          | DNK | 0.24   | 0.23  | 0.22  | 0.21  | 0.19   | 0.22  | 0.23  | 0.22  | 0.24   | 0.19  | 0.22  |
| 33 | Dominican Republic               | DOM | 5.78   | 5.89  | 5.34  | 5.96  | 5.81   | 5.94  | 5.22  | 5.64  | 5.96   | 5.22  | 5.70  |
| 34 | East Timor                       | TLS | 90.96  | 92.31 | 91.92 | 91.46 | 91.23  | 90.95 | 91.20 | 91.06 | 92.31  | 90.95 | 91.39 |
| 35 | Ecuador                          | ECU | 12.22  | 11.44 | 10.17 | 13.63 | 10.16  | 11.01 | 9.34  | 10.49 | 13.63  | 9.34  | 11.06 |
| 36 | El Salvador                      | SLV | 2.54   | 2.55  | 2.45  | 2.45  | 2.58   | 2.64  | 2.67  | 2.54  | 2.67   | 2.45  | 2.55  |
| 37 | Estonia                          | EST | 63.89  | 60.42 | 71.57 | 67.32 | 72.99  | 70.77 | 71.16 | 70.55 | 72.99  | 60.42 | 68.58 |
| 38 | Faroe Islands                    | FRO | 0.00   | 0.00  | 0.00  | 0.00  | 100.00 | 0.00  | 0.00  | 0.00  | 100.00 | 0.00  | 12.50 |
| 39 | Fiji                             | FJI | 32.30  | 31.97 | 32.22 | 32.95 | 37.14  | 34.77 | 35.61 | 35.52 | 37.14  | 31.97 | 34.06 |
| 40 | Finland                          | FIN | 1.55   | 1.41  | 1.82  | 1.43  | 1.59   | 1.69  | 1.70  | 1.63  | 1.82   | 1.41  | 1.60  |
| 41 | France                           | FRA | 3.46   | 3.07  | 4.58  | 2.78  | 4.89   | 3.90  | 3.78  | 3.74  | 4.89   | 2.78  | 3.78  |
| 42 | French Guiana                    | GUF | 0.00   | 0.00  | 25.02 | 0.00  | 0.00   | 0.00  | 11.72 | 21.00 | 25.02  | 0.00  | 7.22  |

|    |               |     |       |       |       |       |       |       |       |       |       |       |       |
|----|---------------|-----|-------|-------|-------|-------|-------|-------|-------|-------|-------|-------|-------|
| 43 | Gabon         | GAB | 0.01  | 0.01  | 0.02  | 0.22  | 0.05  | 0.05  | 0.03  | 0.01  | 0.22  | 0.01  | 0.05  |
| 44 | Georgia       | GEO | 14.00 | 14.61 | 14.08 | 15.25 | 14.92 | 15.64 | 15.69 | 15.88 | 15.88 | 14.00 | 15.01 |
| 45 | Germany       | DEU | 0.30  | 0.27  | 0.42  | 0.31  | 0.38  | 0.33  | 0.35  | 0.36  | 0.42  | 0.27  | 0.34  |
| 46 | Ghana         | GHA | 0.06  | 0.06  | 0.06  | 0.05  | 0.05  | 0.05  | 0.05  | 0.05  | 0.06  | 0.05  | 0.05  |
| 47 | Greece        | GRC | 4.45  | 4.09  | 6.42  | 4.60  | 6.16  | 5.13  | 4.49  | 4.03  | 6.42  | 4.03  | 4.92  |
| 48 | Guatemala     | GTM | 0.53  | 0.53  | 0.46  | 0.45  | 0.47  | 0.48  | 0.55  | 0.47  | 0.55  | 0.45  | 0.49  |
| 49 | Guinea        | GIN | 0.63  | 0.64  | 0.71  | 0.70  | 0.72  | 0.65  | 0.71  | 0.60  | 0.72  | 0.60  | 0.67  |
| 50 | Guinea Bissau | GNB | 12.03 | 12.20 | 13.84 | 17.25 | 15.25 | 18.74 | 12.25 | 10.48 | 18.74 | 10.48 | 14.00 |
| 51 | Haiti         | HTI | 2.79  | 3.32  | 2.58  | 2.62  | 2.45  | 2.35  | 2.71  | 3.20  | 3.32  | 2.35  | 2.75  |
| 52 | Honduras      | HND | 6.60  | 5.68  | 8.17  | 7.81  | 7.58  | 7.37  | 6.31  | 5.86  | 8.17  | 5.68  | 6.92  |
| 53 | Hungary       | HUN | 0.78  | 0.66  | 0.80  | 0.79  | 0.84  | 0.71  | 0.79  | 0.77  | 0.84  | 0.66  | 0.77  |
| 54 | India         | IND | 4.55  | 4.57  | 4.87  | 5.12  | 5.23  | 4.88  | 5.18  | 5.21  | 5.23  | 4.55  | 4.95  |
| 55 | Indonesia     | IDN | 1.91  | 2.05  | 1.81  | 1.87  | 1.67  | 2.01  | 2.01  | 2.07  | 2.07  | 1.67  | 1.92  |
| 56 | Iran          | IRN | 36.89 | 36.42 | 38.57 | 37.53 | 35.73 | 37.67 | 38.18 | 36.67 | 38.57 | 35.73 | 37.21 |
| 57 | Iraq          | IRQ | 24.31 | 24.03 | 22.40 | 24.35 | 22.08 | 23.85 | 29.76 | 32.13 | 32.13 | 22.08 | 25.36 |
| 58 | Ireland       | IRL | 6.21  | 6.23  | 12.11 | 6.16  | 19.61 | 9.07  | 11.84 | 9.59  | 19.61 | 6.16  | 10.10 |
| 59 | Israel        | ISR | 2.11  | 2.16  | 2.16  | 1.75  | 2.53  | 2.19  | 1.03  | 0.74  | 2.53  | 0.74  | 1.83  |
| 60 | Italy         | ITA | 7.19  | 7.09  | 8.01  | 7.12  | 7.71  | 7.34  | 6.88  | 6.70  | 8.01  | 6.70  | 7.25  |
| 61 | Ivory Coast   | CIV | 0.00  | 0.00  | 0.00  | 0.00  | 0.00  | 0.00  | 0.00  | 0.00  | 0.00  | 0.00  | 0.00  |
| 62 | Japan         | JPN | 4.75  | 4.70  | 5.16  | 3.72  | 8.81  | 5.95  | 6.25  | 7.36  | 8.81  | 3.72  | 5.84  |
| 63 | Jordan        | JOR | 24.99 | 23.37 | 27.28 | 25.97 | 24.22 | 25.85 | 16.87 | 15.34 | 27.28 | 15.34 | 22.99 |
| 64 | Kazakhstan    | KAZ | 32.62 | 31.35 | 41.61 | 42.20 | 37.57 | 42.75 | 45.34 | 44.86 | 45.34 | 31.35 | 39.79 |
| 65 | Kenya         | KEN | 0.54  | 0.47  | 0.64  | 0.65  | 0.47  | 0.46  | 0.63  | 0.56  | 0.65  | 0.46  | 0.55  |
| 66 | Kosovo        | KOS | 4.03  | 5.11  | 4.32  | 3.53  | 2.52  | 4.04  | 4.77  | 4.41  | 5.11  | 2.52  | 4.09  |
| 67 | Kyrgyzstan    | KGZ | 25.45 | 24.70 | 36.14 | 34.55 | 30.89 | 36.74 | 41.74 | 41.79 | 41.79 | 24.70 | 34.00 |
| 68 | Laos          | LAO | 36.72 | 37.51 | 38.13 | 38.53 | 36.29 | 37.88 | 38.48 | 38.18 | 38.53 | 36.29 | 37.72 |



|    |                          |     |       |        |       |       |       |       |       |       |        |       |       |
|----|--------------------------|-----|-------|--------|-------|-------|-------|-------|-------|-------|--------|-------|-------|
| 69 | Latvia                   | LVA | 71.85 | 70.68  | 76.31 | 60.94 | 75.65 | 72.46 | 78.14 | 77.67 | 78.14  | 60.94 | 72.96 |
| 70 | Lebanon                  | LBN | 14.70 | 10.78  | 10.40 | 12.98 | 13.45 | 11.72 | 13.40 | 15.36 | 15.36  | 10.40 | 12.85 |
| 71 | Liberia                  | LBR | 0.13  | 0.12   | 0.13  | 0.25  | 0.12  | 0.38  | 0.12  | 0.12  | 0.38   | 0.12  | 0.17  |
| 72 | Libya                    | LBY | 6.46  | 6.35   | 7.64  | 7.15  | 6.83  | 7.31  | 5.10  | 4.11  | 7.64   | 4.11  | 6.37  |
| 73 | Lithuania                | LTU | 31.40 | 30.83  | 35.66 | 26.16 | 35.00 | 33.49 | 36.58 | 36.20 | 36.58  | 26.16 | 33.16 |
| 74 | Luxembourg               | LUX | 6.58  | 6.88   | 16.18 | 4.76  | 10.35 | 12.22 | 14.09 | 14.68 | 16.18  | 4.76  | 10.72 |
| 75 | Macedonia                | MKD | 31.08 | 30.53  | 30.65 | 27.70 | 28.21 | 29.40 | 30.05 | 29.13 | 31.08  | 27.70 | 29.59 |
| 76 | Madagascar               | MDG | 18.47 | 20.88  | 26.06 | 27.49 | 25.77 | 26.03 | 24.02 | 22.69 | 27.49  | 18.47 | 23.93 |
| 77 | Mexico                   | MEX | 5.41  | 5.13   | 5.91  | 5.68  | 6.75  | 6.33  | 5.61  | 5.12  | 6.75   | 5.12  | 5.74  |
| 78 | Mongolia                 | MNG | 12.51 | 12.83  | 12.39 | 9.44  | 15.72 | 13.91 | 13.79 | 13.18 | 15.72  | 9.44  | 12.97 |
| 79 | Montenegro               | MNE | 6.65  | 13.48  | 8.63  | 8.10  | 3.47  | 6.14  | 11.09 | 11.36 | 13.48  | 3.47  | 8.61  |
| 80 | Morocco                  | MAR | 19.51 | 18.84  | 16.04 | 16.09 | 15.03 | 12.60 | 8.70  | 5.39  | 19.51  | 5.39  | 14.03 |
| 81 | Mozambique               | MOZ | 0.59  | 0.68   | 0.69  | 0.87  | 0.83  | 0.95  | 0.66  | 0.58  | 0.95   | 0.58  | 0.73  |
| 82 | Myanmar                  | MMR | 2.11  | 2.06   | 2.08  | 2.09  | 2.00  | 2.15  | 2.03  | 2.02  | 2.15   | 2.00  | 2.07  |
| 83 | Nepal                    | NPL | 1.83  | 2.43   | 1.94  | 1.83  | 2.80  | 1.38  | 2.72  | 2.97  | 2.97   | 1.38  | 2.24  |
| 84 | Netherlands              | NLD | 0.10  | 0.10   | 0.23  | 0.05  | 0.23  | 0.24  | 0.21  | 0.22  | 0.24   | 0.05  | 0.17  |
| 85 | New Caledonia            | NCL | 68.12 | 67.26  | 70.18 | 69.53 | 67.89 | 69.42 | 67.87 | 69.15 | 70.18  | 67.26 | 68.68 |
| 86 | New Zealand              | NZL | 5.92  | 6.12   | 31.16 | 31.56 | 11.71 | 37.58 | 20.21 | 26.07 | 37.58  | 5.92  | 21.29 |
| 87 | Nicaragua                | NIC | 51.67 | 51.12  | 53.35 | 54.73 | 52.33 | 52.68 | 50.38 | 50.84 | 54.73  | 50.38 | 52.14 |
| 88 | North Korea              | PRK | 20.47 | 21.27  | 21.79 | 23.43 | 32.57 | 22.87 | 29.68 | 30.77 | 32.57  | 20.47 | 25.36 |
| 89 | Northern Cyprus          | CYN | 0.00  | 100.00 | 94.27 | 98.88 | 99.39 | 96.36 | 92.64 | 95.63 | 100.00 | 0.00  | 84.65 |
| 90 | Northern Mariana Islands | MNP | 43.38 | 37.76  | 43.14 | 42.86 | 42.86 | 42.86 | 35.98 | 35.98 | 43.38  | 35.98 | 40.61 |
| 91 | Norway                   | NOR | 1.16  | 1.50   | 1.24  | 1.33  | 2.42  | 2.24  | 2.08  | 2.17  | 2.42   | 1.16  | 1.77  |
| 92 | Oman                     | OMN | 1.32  | 1.27   | 1.34  | 1.61  | 1.55  | 1.58  | 1.14  | 1.50  | 1.61   | 1.14  | 1.41  |
| 93 | Pakistan                 | PAK | 0.01  | 0.00   | 0.05  | 0.01  | 0.04  | 0.02  | 0.02  | 0.06  | 0.06   | 0.00  | 0.03  |
| 94 | Panama                   | PAN | 7.74  | 7.71   | 6.35  | 6.80  | 6.94  | 6.12  | 6.00  | 6.72  | 7.74   | 6.00  | 6.80  |

|     |                    |     |       |       |       |       |       |       |       |       |       |       |       |
|-----|--------------------|-----|-------|-------|-------|-------|-------|-------|-------|-------|-------|-------|-------|
| 95  | Papua New Guinea   | PNG | 0.26  | 0.32  | 0.30  | 0.33  | 0.63  | 0.25  | 0.48  | 0.53  | 0.63  | 0.25  | 0.39  |
| 96  | Peru               | PER | 36.54 | 17.93 | 14.20 | 23.44 | 22.23 | 13.96 | 15.98 | 13.50 | 36.54 | 13.50 | 19.72 |
| 97  | Poland             | POL | 10.24 | 9.83  | 10.50 | 10.32 | 10.47 | 10.45 | 10.72 | 10.60 | 10.72 | 9.83  | 10.39 |
| 98  | Portugal           | PRT | 17.63 | 17.08 | 19.65 | 17.68 | 18.53 | 18.00 | 15.71 | 14.81 | 19.65 | 14.81 | 17.39 |
| 99  | Republic of Serbia | SRB | 2.40  | 2.63  | 2.62  | 2.23  | 1.32  | 2.20  | 2.99  | 3.06  | 3.06  | 1.32  | 2.43  |
| 100 | Romania            | ROU | 1.71  | 1.56  | 2.02  | 1.36  | 2.07  | 1.80  | 2.12  | 2.09  | 2.12  | 1.36  | 1.84  |
| 101 | Russia             | RUS | 28.46 | 27.53 | 34.25 | 32.82 | 23.62 | 33.81 | 35.86 | 35.51 | 35.86 | 23.62 | 31.48 |
| 102 | Sierra Leone       | SLE | 0.52  | 0.52  | 0.66  | 0.78  | 0.79  | 1.11  | 0.79  | 0.41  | 1.11  | 0.41  | 0.70  |
| 103 | Slovakia           | SVK | 1.28  | 1.25  | 1.68  | 1.53  | 1.84  | 1.54  | 1.63  | 1.55  | 1.84  | 1.25  | 1.54  |
| 104 | Slovenia           | SVN | 6.91  | 7.04  | 7.47  | 7.18  | 7.67  | 7.29  | 8.17  | 8.37  | 8.37  | 6.91  | 7.51  |
| 105 | Somalia            | SOM | 0.09  | 0.10  | 0.10  | 0.09  | 0.08  | 0.09  | 0.09  | 0.09  | 0.10  | 0.08  | 0.09  |
| 106 | South Africa       | ZAF | 2.74  | 2.74  | 2.96  | 3.90  | 1.36  | 2.92  | 2.58  | 3.11  | 3.90  | 1.36  | 2.79  |
| 107 | South Korea        | KOR | 12.01 | 12.13 | 14.34 | 13.84 | 14.28 | 13.19 | 14.64 | 14.34 | 14.64 | 12.01 | 13.60 |
| 108 | Spain              | ESP | 5.03  | 5.08  | 6.58  | 4.93  | 6.10  | 5.40  | 4.79  | 4.37  | 6.58  | 4.37  | 5.29  |
| 109 | Sri Lanka          | LKA | 15.90 | 16.04 | 16.52 | 17.55 | 19.29 | 16.30 | 16.83 | 16.85 | 19.29 | 15.90 | 16.91 |
| 110 | Suriname           | SUR | 0.00  | 0.00  | 0.31  | 0.00  | 0.00  | 0.00  | 0.32  | 0.26  | 0.32  | 0.00  | 0.11  |
| 111 | Sweden             | SWE | 22.09 | 20.64 | 28.37 | 22.22 | 28.64 | 25.02 | 25.93 | 25.97 | 28.64 | 20.64 | 24.86 |
| 112 | Switzerland        | CHE | 0.03  | 0.03  | 0.07  | 0.03  | 0.07  | 0.03  | 0.03  | 0.04  | 0.07  | 0.03  | 0.04  |
| 113 | Syria              | SYR | 0.75  | 0.61  | 1.32  | 0.96  | 0.46  | 0.96  | 0.92  | 0.73  | 1.32  | 0.46  | 0.84  |
| 114 | Tajikistan         | TJK | 19.62 | 19.60 | 29.30 | 31.58 | 27.66 | 30.57 | 33.31 | 33.43 | 33.43 | 19.60 | 28.14 |
| 115 | Thailand           | THA | 1.68  | 1.69  | 1.73  | 1.93  | 2.11  | 1.76  | 1.82  | 1.81  | 2.11  | 1.68  | 1.82  |
| 116 | The Bahamas        | BHS | 0.00  | 0.00  | 11.66 | 0.00  | 0.00  | 0.00  | 0.00  | 5.22  | 11.66 | 0.00  | 2.11  |
| 117 | Tunisia            | TUN | 6.55  | 6.47  | 7.35  | 6.57  | 6.02  | 6.51  | 3.25  | 1.88  | 7.35  | 1.88  | 5.57  |
| 118 | Turkey             | TUR | 18.45 | 18.13 | 21.55 | 20.67 | 18.55 | 20.31 | 19.91 | 19.82 | 21.55 | 18.13 | 19.67 |
| 119 | Turkmenistan       | TKM | 0.00  | 0.00  | 0.07  | 0.07  | 0.00  | 0.06  | 0.06  | 0.05  | 0.07  | 0.00  | 0.04  |
| 120 | Ukraine            | UKR | 2.27  | 2.14  | 2.72  | 2.24  | 2.28  | 2.52  | 2.94  | 2.86  | 2.94  | 2.14  | 2.49  |

|     |                             |     |       |       |       |       |       |       |       |       |       |       |       |
|-----|-----------------------------|-----|-------|-------|-------|-------|-------|-------|-------|-------|-------|-------|-------|
| 121 | United Kingdom              | GBR | 0.43  | 0.36  | 0.52  | 0.30  | 0.57  | 0.44  | 0.45  | 0.42  | 0.57  | 0.30  | 0.43  |
| 122 | United Republic of Tanzania | TZA | 0.23  | 0.23  | 0.25  | 0.30  | 0.27  | 0.31  | 0.29  | 0.29  | 0.31  | 0.23  | 0.27  |
| 123 | United States of America    | USA | 1.16  | 0.86  | 2.25  | 3.22  | 3.71  | 3.66  | 3.11  | 3.06  | 3.71  | 0.86  | 2.63  |
| 124 | Uzbekistan                  | UZB | 2.34  | 2.21  | 3.59  | 3.70  | 3.67  | 3.84  | 3.86  | 3.81  | 3.86  | 2.21  | 3.38  |
| 125 | Venezuela                   | VEN | 36.70 | 37.13 | 34.24 | 29.92 | 36.30 | 34.42 | 35.80 | 35.47 | 37.13 | 29.92 | 35.00 |
| 126 | Vietnam                     | VNM | 10.89 | 10.29 | 10.86 | 9.62  | 11.34 | 9.66  | 9.56  | 9.99  | 11.34 | 9.56  | 10.28 |
| 127 | West Bank                   | PSE | 3.57  | 3.21  | 3.60  | 4.05  | 3.92  | 3.65  | 0.46  | 0.24  | 4.05  | 0.24  | 2.84  |
| 128 | Zambia                      | ZMB | 4.38  | 4.40  | 4.46  | 3.61  | 3.12  | 3.54  | 4.53  | 4.39  | 4.53  | 3.12  | 4.05  |

## Supplementary Table 4

Percentage of cropland losses for countries under shared approach in 2050 at biome scale(%)

|    | country             | ISO3 | SSP1_RCP19 | SSP1_RCP26 | SSP2_RCP45 | SSP3_RCP70 | SSP4_RCP34 | SSP4_RCP60 | SSP5_RCP34 | SSP5_RCP85 | max    | min   | mean  |
|----|---------------------|------|------------|------------|------------|------------|------------|------------|------------|------------|--------|-------|-------|
| 1  | Aland               | ALA  | 52.92      | 100.00     | 2.96       | 55.34      | 9.35       | 36.85      | 11.15      | 14.88      | 100.00 | 2.96  | 35.43 |
| 2  | Albania             | ALB  | 0.22       | 0.55       | 0.29       | 0.45       | 0.14       | 0.34       | 0.35       | 0.47       | 0.55   | 0.14  | 0.35  |
| 3  | Antigua and Barbuda | ATG  | 1.04       | 1.00       | 8.52       | 1.04       | 2.42       | 3.23       | 48.29      | 11.74      | 48.29  | 1.00  | 9.66  |
| 4  | Argentina           | ARG  | 0.01       | 0.01       | 0.02       | 0.01       | 0.02       | 0.02       | 0.03       | 0.02       | 0.03   | 0.01  | 0.02  |
| 5  | Armenia             | ARM  | 11.40      | 10.94      | 12.49      | 10.52      | 11.33      | 13.28      | 17.12      | 18.03      | 18.03  | 10.52 | 13.14 |
| 6  | Australia           | AUS  | 8.01       | 6.79       | 7.60       | 7.50       | 6.89       | 9.35       | 6.85       | 7.20       | 9.35   | 6.79  | 7.53  |
| 7  | Azerbaijan          | AZE  | 4.91       | 5.20       | 5.60       | 4.91       | 6.10       | 6.01       | 6.41       | 6.95       | 6.95   | 4.91  | 5.76  |
| 8  | Belarus             | BLR  | 20.83      | 16.12      | 22.86      | 17.30      | 21.53      | 24.45      | 25.73      | 26.91      | 26.91  | 16.12 | 21.96 |
| 9  | Belgium             | BEL  | 0.01       | 0.02       | 0.12       | 0.01       | 0.16       | 0.10       | 0.11       | 0.05       | 0.16   | 0.01  | 0.07  |
| 10 | Bhutan              | BTN  | 31.60      | 36.69      | 36.43      | 35.53      | 48.23      | 30.20      | 42.38      | 30.42      | 48.23  | 30.20 | 36.43 |
| 11 | Bolivia             | BOL  | 44.75      | 40.66      | 45.15      | 50.37      | 53.62      | 43.97      | 45.44      | 47.36      | 53.62  | 40.66 | 46.41 |

|    |                        |     |       |       |       |       |       |       |       |       |       |       |       |
|----|------------------------|-----|-------|-------|-------|-------|-------|-------|-------|-------|-------|-------|-------|
| 12 | Bosnia and Herzegovina | BIH | 12.37 | 12.58 | 13.17 | 10.62 | 8.88  | 12.17 | 13.65 | 13.82 | 13.82 | 8.88  | 12.16 |
| 13 | Brazil                 | BRA | 2.25  | 2.08  | 2.57  | 2.75  | 2.13  | 2.36  | 2.84  | 2.92  | 2.92  | 2.08  | 2.49  |
| 14 | Bulgaria               | BGR | 1.73  | 1.59  | 2.47  | 1.02  | 2.94  | 1.85  | 2.53  | 2.72  | 2.94  | 1.02  | 2.11  |
| 15 | Cambodia               | KHM | 14.72 | 11.65 | 16.98 | 16.37 | 24.24 | 12.84 | 15.54 | 17.13 | 24.24 | 11.65 | 16.18 |
| 16 | Canada                 | CAN | 0.67  | 0.82  | 1.31  | 1.57  | 0.16  | 0.98  | 1.30  | 1.38  | 1.57  | 0.16  | 1.02  |
| 17 | Cape Verde             | CPV | 5.09  | 3.23  | 25.19 | 41.18 | 34.25 | 35.93 | 33.16 | 32.72 | 41.18 | 3.23  | 26.34 |
| 18 | Chile                  | CHL | 4.60  | 4.24  | 9.49  | 6.42  | 8.10  | 9.19  | 10.87 | 10.17 | 10.87 | 4.24  | 7.88  |
| 19 | China                  | CHN | 1.81  | 1.41  | 1.89  | 1.19  | 2.35  | 1.92  | 2.15  | 2.26  | 2.35  | 1.19  | 1.87  |
| 20 | Colombia               | COL | 7.84  | 6.89  | 11.36 | 14.08 | 15.58 | 10.16 | 13.30 | 14.15 | 15.58 | 6.89  | 11.67 |
| 21 | Croatia                | HRV | 1.74  | 0.90  | 1.85  | 0.92  | 1.79  | 2.25  | 2.44  | 2.42  | 2.44  | 0.90  | 1.79  |
| 22 | Cuba                   | CUB | 0.00  | 0.00  | 0.12  | 0.49  | 0.65  | 0.12  | 0.34  | 0.48  | 0.65  | 0.00  | 0.28  |
| 23 | Czech Republic         | CZE | 0.05  | 0.05  | 0.08  | 0.08  | 0.15  | 0.14  | 0.13  | 0.12  | 0.15  | 0.05  | 0.10  |
| 24 | Denmark                | DNK | 0.03  | 0.02  | 0.03  | 0.02  | 0.05  | 0.06  | 0.07  | 0.07  | 0.07  | 0.02  | 0.04  |
| 25 | Dominican Republic     | DOM | 0.00  | 0.00  | 0.65  | 2.15  | 2.15  | 0.40  | 1.40  | 1.76  | 2.15  | 0.00  | 1.06  |
| 26 | East Timor             | TLS | 33.09 | 23.15 | 62.03 | 78.78 | 84.38 | 48.37 | 75.20 | 79.39 | 84.38 | 23.15 | 60.55 |
| 27 | Ecuador                | ECU | 8.50  | 7.69  | 7.20  | 11.28 | 8.40  | 8.02  | 7.19  | 8.60  | 11.28 | 7.19  | 8.36  |
| 28 | Estonia                | EST | 46.08 | 41.22 | 57.13 | 50.17 | 60.09 | 56.46 | 58.41 | 59.57 | 60.09 | 41.22 | 53.64 |
| 29 | Fiji                   | FJI | 0.16  | 0.00  | 0.46  | 2.82  | 7.75  | 0.49  | 2.46  | 4.39  | 7.75  | 0.00  | 2.32  |
| 30 | Finland                | FIN | 0.07  | 0.00  | 0.15  | 0.00  | 0.15  | 0.11  | 0.15  | 0.11  | 0.15  | 0.00  | 0.09  |
| 31 | France                 | FRA | 1.29  | 0.94  | 1.79  | 0.81  | 2.07  | 1.53  | 1.47  | 1.50  | 2.07  | 0.81  | 1.42  |
| 32 | Georgia                | GEO | 10.74 | 10.04 | 10.78 | 9.60  | 11.48 | 11.71 | 10.90 | 11.50 | 11.71 | 9.60  | 10.84 |
| 33 | Germany                | DEU | 0.09  | 0.05  | 0.11  | 0.07  | 0.08  | 0.06  | 0.08  | 0.09  | 0.11  | 0.05  | 0.08  |
| 34 | Greece                 | GRC | 0.02  | 0.02  | 0.04  | 0.02  | 0.07  | 0.02  | 0.05  | 0.05  | 0.07  | 0.02  | 0.04  |
| 35 | Honduras               | HND | 0.48  | 0.29  | 1.00  | 1.83  | 2.34  | 0.67  | 0.75  | 1.27  | 2.34  | 0.29  | 1.08  |
| 36 | Hungary                | HUN | 0.08  | 0.08  | 0.08  | 0.08  | 0.08  | 0.08  | 0.08  | 0.08  | 0.08  | 0.08  | 0.08  |
| 37 | India                  | IND | 0.18  | 0.08  | 0.42  | 0.74  | 1.07  | 0.27  | 0.65  | 0.79  | 1.07  | 0.08  | 0.53  |

|    |               |     |       |       |       |       |       |       |       |       |       |       |       |
|----|---------------|-----|-------|-------|-------|-------|-------|-------|-------|-------|-------|-------|-------|
| 38 | Indonesia     | IDN | 0.26  | 0.18  | 0.33  | 0.54  | 0.55  | 0.41  | 0.66  | 0.73  | 0.73  | 0.18  | 0.46  |
| 39 | Iran          | IRN | 18.16 | 15.38 | 18.44 | 15.13 | 18.20 | 19.05 | 18.77 | 18.29 | 19.05 | 15.13 | 17.68 |
| 40 | Iraq          | IRQ | 15.35 | 15.13 | 13.94 | 14.81 | 12.96 | 14.42 | 20.42 | 23.72 | 23.72 | 12.96 | 16.34 |
| 41 | Ireland       | IRL | 1.32  | 0.44  | 2.81  | 0.27  | 10.33 | 1.49  | 2.74  | 1.26  | 10.33 | 0.27  | 2.58  |
| 42 | Italy         | ITA | 0.11  | 0.08  | 0.22  | 0.10  | 0.26  | 0.14  | 0.17  | 0.16  | 0.26  | 0.08  | 0.16  |
| 43 | Japan         | JPN | 2.31  | 2.02  | 2.41  | 1.51  | 3.72  | 2.85  | 2.86  | 3.15  | 3.72  | 1.51  | 2.60  |
| 44 | Kosovo        | KOS | 0.39  | 0.49  | 0.36  | 0.41  | 0.21  | 0.42  | 0.52  | 0.50  | 0.52  | 0.21  | 0.41  |
| 45 | Laos          | LAO | 14.47 | 13.17 | 18.96 | 21.52 | 24.03 | 16.46 | 20.32 | 21.79 | 24.03 | 13.17 | 18.84 |
| 46 | Latvia        | LVA | 44.80 | 39.62 | 52.50 | 24.17 | 54.88 | 46.98 | 56.51 | 57.58 | 57.58 | 24.17 | 47.13 |
| 47 | Lithuania     | LTU | 12.61 | 9.82  | 14.89 | 6.23  | 16.00 | 14.44 | 16.35 | 16.51 | 16.51 | 6.23  | 13.36 |
| 48 | Luxembourg    | LUX | 6.58  | 6.88  | 16.18 | 4.76  | 10.35 | 12.22 | 14.09 | 14.68 | 16.18 | 4.76  | 10.72 |
| 49 | Macedonia     | MKD | 8.49  | 5.55  | 7.65  | 4.44  | 6.58  | 7.21  | 7.27  | 7.28  | 8.49  | 4.44  | 6.81  |
| 50 | Madagascar    | MDG | 12.23 | 12.99 | 21.21 | 23.97 | 23.36 | 20.57 | 19.38 | 18.35 | 23.97 | 12.23 | 19.01 |
| 51 | Mexico        | MEX | 1.38  | 1.09  | 2.04  | 2.76  | 4.02  | 2.12  | 2.32  | 2.30  | 4.02  | 1.09  | 2.25  |
| 52 | Montenegro    | MNE | 2.33  | 3.06  | 2.45  | 2.93  | 2.11  | 2.77  | 3.61  | 3.63  | 3.63  | 2.11  | 2.86  |
| 53 | Myanmar       | MMR | 0.63  | 0.59  | 0.79  | 0.90  | 1.10  | 0.73  | 0.84  | 0.98  | 1.10  | 0.59  | 0.82  |
| 54 | Nepal         | NPL | 1.45  | 1.78  | 1.43  | 1.20  | 1.66  | 0.88  | 1.91  | 2.01  | 2.01  | 0.88  | 1.54  |
| 55 | Netherlands   | NLD | 0.10  | 0.10  | 0.12  | 0.05  | 0.13  | 0.12  | 0.10  | 0.11  | 0.13  | 0.05  | 0.10  |
| 56 | New Caledonia | NCL | 68.12 | 67.26 | 70.18 | 69.53 | 67.89 | 69.42 | 67.87 | 69.15 | 70.18 | 67.26 | 68.68 |
| 57 | New Zealand   | NZL | 0.49  | 0.00  | 2.12  | 2.16  | 1.03  | 0.24  | 1.02  | 4.12  | 4.12  | 0.00  | 1.40  |
| 58 | Nicaragua     | NIC | 8.45  | 4.24  | 23.13 | 40.86 | 45.00 | 14.98 | 36.11 | 40.78 | 45.00 | 4.24  | 26.69 |
| 59 | North Korea   | PRK | 8.80  | 7.88  | 8.80  | 8.24  | 17.31 | 10.15 | 13.94 | 15.11 | 17.31 | 7.88  | 11.28 |
| 60 | Norway        | NOR | 0.70  | 0.42  | 0.31  | 0.36  | 1.41  | 1.15  | 1.01  | 1.04  | 1.41  | 0.31  | 0.80  |
| 61 | Pakistan      | PAK | 0.00  | 0.00  | 0.03  | 0.00  | 0.02  | 0.01  | 0.01  | 0.03  | 0.03  | 0.00  | 0.01  |
| 62 | Panama        | PAN | 1.05  | 1.00  | 0.91  | 1.14  | 1.10  | 0.86  | 0.99  | 1.05  | 1.14  | 0.86  | 1.01  |
| 63 | Peru          | PER | 35.21 | 16.19 | 13.08 | 23.24 | 22.01 | 12.55 | 15.57 | 13.11 | 35.21 | 12.55 | 18.87 |

|    |                          |     |       |       |       |       |       |       |       |       |       |       |       |
|----|--------------------------|-----|-------|-------|-------|-------|-------|-------|-------|-------|-------|-------|-------|
| 64 | Poland                   | POL | 5.31  | 4.40  | 5.19  | 4.51  | 5.43  | 5.50  | 5.54  | 5.56  | 5.56  | 4.40  | 5.18  |
| 65 | Portugal                 | PRT | 1.70  | 1.76  | 1.71  | 1.68  | 1.78  | 1.63  | 1.64  | 1.61  | 1.78  | 1.61  | 1.69  |
| 66 | Republic of Serbia       | SRB | 0.54  | 0.29  | 0.56  | 0.22  | 0.39  | 0.59  | 0.70  | 0.73  | 0.73  | 0.22  | 0.50  |
| 67 | Romania                  | ROU | 0.26  | 0.12  | 0.29  | 0.10  | 0.33  | 0.26  | 0.32  | 0.32  | 0.33  | 0.10  | 0.25  |
| 68 | Russia                   | RUS | 9.84  | 8.09  | 10.02 | 6.83  | 5.27  | 9.32  | 10.46 | 10.68 | 10.68 | 5.27  | 8.81  |
| 69 | Slovakia                 | SVK | 0.19  | 0.18  | 0.26  | 0.23  | 0.27  | 0.22  | 0.25  | 0.41  | 0.41  | 0.18  | 0.25  |
| 70 | Slovenia                 | SVN | 4.92  | 4.97  | 5.14  | 4.92  | 5.43  | 5.10  | 5.22  | 5.53  | 5.53  | 4.92  | 5.15  |
| 71 | South Korea              | KOR | 3.95  | 3.15  | 5.16  | 3.99  | 5.02  | 4.68  | 5.47  | 5.21  | 5.47  | 3.15  | 4.58  |
| 72 | Spain                    | ESP | 0.26  | 0.18  | 0.69  | 0.25  | 0.83  | 0.44  | 0.44  | 0.42  | 0.83  | 0.18  | 0.44  |
| 73 | Sri Lanka                | LKA | 0.31  | 0.10  | 2.99  | 6.56  | 8.91  | 1.33  | 5.28  | 6.18  | 8.91  | 0.10  | 3.96  |
| 74 | Sweden                   | SWE | 10.65 | 8.45  | 15.84 | 9.77  | 17.43 | 13.98 | 14.16 | 14.48 | 17.43 | 8.45  | 13.09 |
| 75 | Switzerland              | CHE | 0.01  | 0.00  | 0.01  | 0.01  | 0.01  | 0.00  | 0.00  | 0.01  | 0.01  | 0.00  | 0.01  |
| 76 | Thailand                 | THA | 0.07  | 0.04  | 0.10  | 0.28  | 0.53  | 0.08  | 0.21  | 0.25  | 0.53  | 0.04  | 0.20  |
| 77 | Turkey                   | TUR | 8.33  | 7.47  | 9.15  | 8.20  | 8.50  | 8.91  | 8.54  | 8.66  | 9.15  | 7.47  | 8.47  |
| 78 | Ukraine                  | UKR | 0.43  | 0.27  | 0.47  | 0.29  | 0.42  | 0.51  | 0.53  | 0.56  | 0.56  | 0.27  | 0.43  |
| 79 | United Kingdom           | GBR | 0.20  | 0.12  | 0.19  | 0.09  | 0.24  | 0.21  | 0.19  | 0.18  | 0.24  | 0.09  | 0.18  |
| 80 | United States of America | USA | 0.19  | 0.14  | 0.25  | 0.33  | 0.53  | 0.47  | 0.31  | 0.31  | 0.53  | 0.14  | 0.31  |
| 81 | Venezuela                | VEN | 24.69 | 24.01 | 24.99 | 22.35 | 28.34 | 24.21 | 27.34 | 27.09 | 28.34 | 22.35 | 25.38 |
| 82 | Vietnam                  | VNM | 3.88  | 3.24  | 4.74  | 5.24  | 7.31  | 3.74  | 5.00  | 5.48  | 7.31  | 3.24  | 4.83  |
| 83 | Zambia                   | ZMB | 4.38  | 4.40  | 4.46  | 3.61  | 3.12  | 3.54  | 4.53  | 4.39  | 4.53  | 3.12  | 4.05  |

## Supplementary Table 5

Percentage of cropland losses for countries under nature-only approach in 2030 at country scale(%)

|    | country                | ISO3 | SSP1_RCP19 | SSP1_RCP26 | SSP2_RCP45 | SSP3_RCP70 | SSP4_RCP34 | SSP4_RCP60 | SSP5_RCP34 | SSP5_RCP85 | max   | min   | mean  |
|----|------------------------|------|------------|------------|------------|------------|------------|------------|------------|------------|-------|-------|-------|
| 1  | Aland                  | ALA  | 3.09       | 2.86       | 11.27      | 2.60       | 3.54       | 4.05       | 8.21       | 3.09       | 11.27 | 2.60  | 4.84  |
| 2  | Albania                | ALB  | 2.85       | 2.89       | 2.21       | 2.79       | 1.68       | 1.98       | 2.54       | 2.44       | 2.89  | 1.68  | 2.42  |
| 3  | Antigua and Barbuda    | ATG  | 1.71       | 1.60       | 48.29      | 8.81       | 11.28      | 33.99      | 48.29      | 39.90      | 48.29 | 1.60  | 24.23 |
| 4  | Azerbaijan             | AZE  | 4.54       | 4.23       | 3.96       | 3.52       | 4.07       | 3.85       | 3.95       | 4.19       | 4.54  | 3.52  | 4.04  |
| 5  | Bangladesh             | BGD  | 16.10      | 15.65      | 15.82      | 16.37      | 16.70      | 15.87      | 17.11      | 17.54      | 17.54 | 15.65 | 16.40 |
| 6  | Belarus                | BLR  | 9.06       | 8.83       | 9.85       | 10.66      | 9.61       | 9.96       | 10.99      | 10.94      | 10.99 | 8.83  | 9.99  |
| 7  | Belgium                | BEL  | 1.88       | 2.66       | 3.70       | 4.07       | 3.44       | 4.03       | 4.05       | 3.22       | 4.07  | 1.88  | 3.38  |
| 8  | Benin                  | BEN  | 4.64       | 5.97       | 5.41       | 3.20       | 4.19       | 4.46       | 6.74       | 5.40       | 6.74  | 3.20  | 5.00  |
| 9  | Bosnia and Herzegovina | BIH  | 8.87       | 8.12       | 4.44       | 8.62       | 2.83       | 5.53       | 5.87       | 5.39       | 8.87  | 2.83  | 6.21  |
| 10 | Bulgaria               | BGR  | 1.25       | 1.25       | 1.80       | 1.07       | 2.36       | 1.22       | 1.92       | 2.12       | 2.36  | 1.07  | 1.62  |
| 11 | Burkina Faso           | BFA  | 19.74      | 19.74      | 20.32      | 20.42      | 22.44      | 21.97      | 20.16      | 19.63      | 22.44 | 19.63 | 20.55 |
| 12 | Burundi                | BDI  | 17.03      | 16.41      | 19.50      | 21.61      | 22.83      | 22.64      | 17.63      | 17.91      | 22.83 | 16.41 | 19.45 |
| 13 | Croatia                | HRV  | 0.57       | 0.57       | 0.13       | 0.35       | 0.00       | 0.06       | 0.33       | 0.30       | 0.57  | 0.00  | 0.29  |
| 14 | Cuba                   | CUB  | 4.21       | 4.15       | 3.73       | 4.25       | 4.05       | 4.16       | 3.78       | 3.93       | 4.25  | 3.73  | 4.03  |
| 15 | Czech Republic         | CZE  | 12.97      | 12.85      | 15.22      | 14.87      | 15.09      | 14.74      | 14.52      | 14.45      | 15.22 | 12.85 | 14.34 |
| 16 | Denmark                | DNK  | 24.37      | 24.31      | 24.19      | 24.11      | 24.06      | 24.32      | 24.17      | 24.14      | 24.37 | 24.06 | 24.21 |
| 17 | Dominican Republic     | DOM  | 8.75       | 9.26       | 9.76       | 10.02      | 9.21       | 10.26      | 9.92       | 9.32       | 10.26 | 8.75  | 9.56  |
| 18 | East Timor             | TLS  | 8.05       | 8.13       | 8.03       | 8.07       | 7.87       | 7.85       | 8.07       | 8.37       | 8.37  | 7.85  | 8.06  |
| 19 | El Salvador            | SLV  | 16.14      | 16.35      | 16.17      | 17.16      | 15.52      | 15.09      | 13.97      | 14.72      | 17.16 | 13.97 | 15.64 |
| 20 | Estonia                | EST  | 4.74       | 4.22       | 6.75       | 6.39       | 6.31       | 5.67       | 6.43       | 6.45       | 6.75  | 4.22  | 5.87  |
| 21 | France                 | FRA  | 6.70       | 6.70       | 8.86       | 9.14       | 9.39       | 8.42       | 8.84       | 8.84       | 9.39  | 6.70  | 8.36  |
| 22 | Gambia                 | GMB  | 27.46      | 27.54      | 27.53      | 27.77      | 28.38      | 27.69      | 27.60      | 27.82      | 28.38 | 27.46 | 27.72 |
| 23 | Gaza                   | Gaza | 19.74      | 19.79      | 18.92      | 19.68      | 19.65      | 20.22      | 19.49      | 19.61      | 20.22 | 18.92 | 19.64 |
| 24 | Germany                | DEU  | 7.98       | 7.94       | 9.03       | 9.11       | 8.76       | 8.93       | 8.92       | 8.77       | 9.11  | 7.94  | 8.68  |
| 25 | Ghana                  | GHA  | 4.17       | 4.29       | 4.11       | 3.61       | 3.58       | 3.53       | 4.74       | 4.52       | 4.74  | 3.53  | 4.07  |

|    |                    |     |       |       |       |       |       |       |       |       |       |       |       |
|----|--------------------|-----|-------|-------|-------|-------|-------|-------|-------|-------|-------|-------|-------|
| 26 | Greece             | GRC | 0.22  | 0.00  | 2.47  | 3.07  | 3.07  | 2.01  | 2.75  | 2.84  | 3.07  | 0.00  | 2.05  |
| 27 | Guam               | GUM | 85.04 | 91.27 | 91.69 | 84.68 | 91.58 | 91.02 | 34.34 | 36.36 | 91.69 | 34.34 | 75.75 |
| 28 | Hungary            | HUN | 14.32 | 14.46 | 14.34 | 14.53 | 14.63 | 14.49 | 14.37 | 14.49 | 14.63 | 14.32 | 14.45 |
| 29 | India              | IND | 9.86  | 9.72  | 9.98  | 10.49 | 10.35 | 9.83  | 11.76 | 11.71 | 11.76 | 9.72  | 10.46 |
| 30 | Italy              | ITA | 6.96  | 6.92  | 8.30  | 8.51  | 8.60  | 8.12  | 8.27  | 8.38  | 8.60  | 6.92  | 8.01  |
| 31 | Japan              | JPN | 0.00  | 0.00  | 0.00  | 0.00  | 4.27  | 0.00  | 0.43  | 4.20  | 4.27  | 0.00  | 1.11  |
| 32 | Kosovo             | KOS | 1.02  | 1.01  | 0.43  | 0.94  | 0.15  | 0.47  | 0.59  | 0.65  | 1.02  | 0.15  | 0.66  |
| 33 | Kyrgyzstan         | KGZ | 0.00  | 0.00  | 3.51  | 0.00  | 0.00  | 2.30  | 7.29  | 7.57  | 7.57  | 0.00  | 2.58  |
| 34 | Latvia             | LVA | 6.90  | 6.65  | 9.47  | 5.37  | 10.20 | 5.56  | 9.71  | 9.90  | 10.20 | 5.37  | 7.97  |
| 35 | Lesotho            | LSO | 3.95  | 4.53  | 6.82  | 4.01  | 8.04  | 8.27  | 5.48  | 3.28  | 8.27  | 3.28  | 5.55  |
| 36 | Liberia            | LBR | 0.34  | 0.29  | 0.34  | 0.28  | 0.34  | 0.05  | 0.53  | 0.06  | 0.53  | 0.05  | 0.28  |
| 37 | Lithuania          | LTU | 15.59 | 15.60 | 16.94 | 14.69 | 17.35 | 15.50 | 17.06 | 17.17 | 17.35 | 14.69 | 16.24 |
| 38 | Malawi             | MWI | 14.79 | 14.78 | 14.94 | 14.36 | 14.59 | 14.75 | 14.95 | 14.70 | 14.95 | 14.36 | 14.73 |
| 39 | Moldova            | MDA | 27.44 | 27.54 | 27.60 | 27.45 | 27.53 | 27.53 | 27.47 | 27.47 | 27.60 | 27.44 | 27.50 |
| 40 | Montenegro         | MNE | 9.50  | 9.99  | 0.00  | 10.03 | 0.00  | 0.24  | 4.81  | 4.47  | 10.03 | 0.00  | 4.88  |
| 41 | Netherlands        | NLD | 2.02  | 2.28  | 3.90  | 4.31  | 4.34  | 3.36  | 4.05  | 4.02  | 4.34  | 2.02  | 3.54  |
| 42 | Nigeria            | NGA | 24.00 | 24.44 | 23.64 | 22.09 | 22.29 | 22.62 | 24.24 | 23.54 | 24.44 | 22.09 | 23.36 |
| 43 | North Korea        | PRK | 4.96  | 5.01  | 4.60  | 4.72  | 4.67  | 4.66  | 4.93  | 5.13  | 5.13  | 4.60  | 4.83  |
| 44 | Northern Cyprus    | CYN | 17.54 | 16.92 | 21.24 | 48.29 | 53.75 | 49.01 | 61.85 | 59.00 | 61.85 | 16.92 | 40.95 |
| 45 | Paraguay           | PRY | 0.00  | 0.00  | 0.74  | 0.00  | 0.00  | 0.00  | 0.21  | 0.33  | 0.74  | 0.00  | 0.16  |
| 46 | Philippines        | PHL | 2.61  | 2.80  | 2.66  | 2.83  | 2.76  | 2.50  | 2.88  | 3.18  | 3.18  | 2.50  | 2.78  |
| 47 | Poland             | POL | 11.33 | 11.35 | 11.99 | 11.82 | 11.99 | 11.83 | 11.84 | 11.86 | 11.99 | 11.33 | 11.75 |
| 48 | Portugal           | PRT | 5.70  | 5.70  | 8.87  | 9.42  | 9.41  | 8.69  | 9.01  | 9.22  | 9.42  | 5.70  | 8.25  |
| 49 | Puerto Rico        | PRI | 0.75  | 0.00  | 1.45  | 0.00  | 0.00  | 0.00  | 1.37  | 0.00  | 1.45  | 0.00  | 0.45  |
| 50 | Republic of Serbia | SRB | 4.81  | 4.71  | 4.17  | 4.78  | 3.58  | 3.94  | 4.23  | 4.42  | 4.81  | 3.58  | 4.33  |
| 51 | Romania            | ROU | 3.51  | 3.44  | 4.00  | 3.27  | 4.29  | 3.46  | 4.14  | 4.27  | 4.29  | 3.27  | 3.80  |



|    |                       |     |       |       |       |       |       |       |       |       |       |       |       |
|----|-----------------------|-----|-------|-------|-------|-------|-------|-------|-------|-------|-------|-------|-------|
| 52 | Rwanda                | RWA | 5.30  | 5.17  | 5.35  | 5.69  | 5.86  | 5.95  | 5.42  | 5.55  | 5.95  | 5.17  | 5.54  |
| 53 | Sao Tome and Principe | STP | 26.00 | 29.90 | 26.10 | 28.81 | 31.97 | 22.93 | 25.84 | 25.58 | 31.97 | 22.93 | 27.14 |
| 54 | Sierra Leone          | SLE | 12.93 | 13.12 | 13.27 | 12.59 | 12.67 | 12.68 | 13.04 | 13.30 | 13.30 | 12.59 | 12.95 |
| 55 | Slovakia              | SVK | 0.00  | 0.00  | 0.21  | 0.21  | 0.21  | 0.15  | 0.18  | 0.16  | 0.21  | 0.00  | 0.14  |
| 56 | Slovenia              | SVN | 1.49  | 1.44  | 2.62  | 1.84  | 2.18  | 1.37  | 1.97  | 1.81  | 2.62  | 1.37  | 1.84  |
| 57 | South Korea           | KOR | 14.06 | 14.12 | 14.48 | 14.77 | 14.38 | 14.35 | 15.19 | 15.60 | 15.60 | 14.06 | 14.62 |
| 58 | Sri Lanka             | LKA | 12.68 | 12.39 | 10.01 | 10.41 | 9.90  | 12.20 | 11.77 | 10.16 | 12.68 | 9.90  | 11.19 |
| 59 | Swaziland             | SWZ | 13.81 | 12.56 | 12.66 | 10.94 | 10.84 | 11.25 | 12.75 | 13.47 | 13.81 | 10.84 | 12.28 |
| 60 | Thailand              | THA | 3.45  | 3.35  | 3.24  | 3.71  | 3.40  | 3.37  | 3.45  | 3.42  | 3.71  | 3.24  | 3.42  |
| 61 | Togo                  | TGO | 10.40 | 11.05 | 10.83 | 8.27  | 8.15  | 10.57 | 11.26 | 10.95 | 11.26 | 8.15  | 10.18 |
| 62 | Tonga                 | TON | 5.43  | 3.35  | 4.01  | 5.94  | 9.24  | 6.91  | 11.70 | 10.33 | 11.70 | 3.35  | 7.11  |
| 63 | Turkey                | TUR | 7.75  | 7.88  | 6.20  | 5.97  | 6.09  | 6.58  | 7.22  | 7.24  | 7.88  | 5.97  | 6.87  |
| 64 | Uganda                | UGA | 13.70 | 14.39 | 13.86 | 12.56 | 12.70 | 12.99 | 13.89 | 13.61 | 14.39 | 12.56 | 13.46 |
| 65 | Ukraine               | UKR | 21.70 | 21.70 | 21.84 | 22.06 | 21.86 | 21.92 | 22.08 | 22.06 | 22.08 | 21.70 | 21.90 |
| 66 | Uruguay               | URY | 0.00  | 0.00  | 0.60  | 0.00  | 0.56  | 0.00  | 2.01  | 0.28  | 2.01  | 0.00  | 0.43  |
| 67 | Vietnam               | VNM | 10.71 | 10.06 | 9.05  | 9.46  | 9.44  | 10.09 | 9.11  | 9.93  | 10.71 | 9.05  | 9.73  |
| 68 | Zimbabwe              | ZWE | 16.51 | 17.19 | 15.75 | 14.48 | 14.29 | 15.15 | 16.58 | 15.72 | 17.19 | 14.29 | 15.71 |

## Supplementary Table 6

Percentage of cropland losses for countries under shared approach in 2030 at country scale(%)

|   | country    | ISO3 | SSP1_RCP19 | SSP1_RCP26 | SSP2_RCP45 | SSP3_RCP70 | SSP4_RCP34 | SSP4_RCP60 | SSP5_RCP34 | SSP5_RCP85 | max   | min   | mean  |
|---|------------|------|------------|------------|------------|------------|------------|------------|------------|------------|-------|-------|-------|
| 1 | Bangladesh | BGD  | 12.12      | 11.25      | 11.62      | 12.43      | 12.96      | 11.64      | 13.54      | 13.99      | 13.99 | 11.25 | 12.44 |
| 2 | Belgium    | BEL  | 1.83       | 2.66       | 2.75       | 2.73       | 0.87       | 2.72       | 2.73       | 1.31       | 2.75  | 0.87  | 2.20  |

|    |                |     |       |       |       |       |       |       |       |       |       |       |       |
|----|----------------|-----|-------|-------|-------|-------|-------|-------|-------|-------|-------|-------|-------|
| 3  | Burkina Faso   | BFA | 0.40  | 0.00  | 4.50  | 8.25  | 13.86 | 13.02 | 1.36  | 2.48  | 13.86 | 0.00  | 5.48  |
| 4  | Burundi        | BDI | 1.56  | 0.00  | 7.22  | 13.18 | 15.97 | 15.81 | 3.09  | 5.78  | 15.97 | 0.00  | 7.83  |
| 5  | Czech Republic | CZE | 10.82 | 11.03 | 12.56 | 12.32 | 12.43 | 12.21 | 11.88 | 11.75 | 12.56 | 10.82 | 11.88 |
| 6  | Denmark        | DNK | 23.43 | 22.96 | 23.06 | 22.73 | 21.33 | 22.95 | 22.81 | 23.19 | 23.43 | 21.33 | 22.81 |
| 7  | France         | FRA | 0.18  | 0.19  | 2.32  | 1.32  | 1.92  | 1.61  | 1.49  | 1.34  | 2.32  | 0.18  | 1.30  |
| 8  | Gambia         | GMB | 2.67  | 0.96  | 2.67  | 6.53  | 9.01  | 7.08  | 2.64  | 9.61  | 9.61  | 0.96  | 5.15  |
| 9  | Germany        | DEU | 6.97  | 7.02  | 7.31  | 7.27  | 6.56  | 7.33  | 7.12  | 6.92  | 7.33  | 6.56  | 7.06  |
| 10 | Hungary        | HUN | 11.99 | 12.18 | 12.12 | 12.40 | 12.38 | 12.14 | 11.98 | 12.25 | 12.40 | 11.98 | 12.18 |
| 11 | India          | IND | 0.00  | 0.00  | 0.00  | 0.00  | 0.00  | 0.00  | 0.59  | 0.54  | 0.59  | 0.00  | 0.14  |
| 12 | Lithuania      | LTU | 0.00  | 0.00  | 0.00  | 0.00  | 0.00  | 1.67  | 0.00  | 0.00  | 1.67  | 0.00  | 0.21  |
| 13 | Moldova        | MDA | 25.90 | 26.21 | 27.16 | 25.19 | 26.20 | 26.43 | 25.69 | 25.92 | 27.16 | 25.19 | 26.09 |
| 14 | Netherlands    | NLD | 2.02  | 2.14  | 2.43  | 2.43  | 2.51  | 2.43  | 2.49  | 2.45  | 2.51  | 2.02  | 2.36  |
| 15 | Nigeria        | NGA | 0.00  | 0.00  | 0.00  | 0.35  | 2.58  | 1.97  | 0.00  | 0.41  | 2.58  | 0.00  | 0.66  |
| 16 | Poland         | POL | 0.00  | 0.00  | 0.00  | 0.00  | 1.45  | 0.81  | 0.12  | 0.15  | 1.45  | 0.00  | 0.32  |
| 17 | Puerto Rico    | PRI | 0.75  | 0.00  | 0.13  | 0.00  | 0.00  | 0.00  | 0.06  | 0.00  | 0.75  | 0.00  | 0.12  |
| 18 | Romania        | ROU | 1.72  | 1.54  | 2.17  | 1.33  | 2.25  | 1.92  | 2.13  | 2.27  | 2.27  | 1.33  | 1.92  |
| 19 | Ukraine        | UKR | 19.07 | 19.04 | 19.10 | 19.33 | 19.17 | 19.17 | 19.29 | 19.33 | 19.33 | 19.04 | 19.19 |

## Supplementary Table 7

Percentage of cropland losses for countries under nature-only approach in 2050 at country scale(%)

|   | country | ISO3 | SSP1_RCP19 | SSP1_RCP26 | SSP2_RCP45 | SSP3_RCP70 | SSP4_RCP34 | SSP4_RCP60 | SSP5_RCP34 | SSP5_RCP85 | max   | min  | mean  |
|---|---------|------|------------|------------|------------|------------|------------|------------|------------|------------|-------|------|-------|
| 1 | Aland   | ALA  | 0.79       | 0.00       | 20.49      | 1.11       | 27.37      | 10.48      | 11.15      | 14.88      | 27.37 | 0.00 | 10.79 |
| 2 | Albania | ALB  | 12.21      | 15.74      | 12.91      | 13.01      | 6.82       | 12.76      | 14.79      | 13.69      | 15.74 | 6.82 | 12.74 |

|    |                        |     |       |       |       |       |       |       |        |       |        |       |       |
|----|------------------------|-----|-------|-------|-------|-------|-------|-------|--------|-------|--------|-------|-------|
| 3  | Antigua and Barbuda    | ATG | 2.16  | 2.07  | 17.64 | 2.15  | 5.02  | 6.68  | 100.00 | 24.31 | 100.00 | 2.07  | 20.00 |
| 4  | Armenia                | ARM | 8.16  | 8.87  | 10.45 | 9.29  | 8.39  | 10.63 | 13.23  | 16.01 | 16.01  | 8.16  | 10.63 |
| 5  | Austria                | AUT | 10.74 | 10.93 | 12.53 | 10.39 | 11.77 | 11.37 | 10.71  | 10.51 | 12.53  | 10.39 | 11.12 |
| 6  | Azerbaijan             | AZE | 21.34 | 22.90 | 21.84 | 21.54 | 22.64 | 21.30 | 21.84  | 22.17 | 22.90  | 21.30 | 21.95 |
| 7  | Bangladesh             | BGD | 41.25 | 40.97 | 40.72 | 41.17 | 42.67 | 40.99 | 42.11  | 42.41 | 42.67  | 40.72 | 41.54 |
| 8  | Barbados               | BRB | 16.88 | 13.85 | 15.37 | 18.51 | 18.05 | 15.45 | 13.64  | 15.93 | 18.51  | 13.64 | 15.96 |
| 9  | Belarus                | BLR | 26.08 | 26.37 | 28.26 | 27.75 | 25.57 | 28.39 | 29.68  | 29.76 | 29.76  | 25.57 | 27.73 |
| 10 | Belgium                | BEL | 20.96 | 20.36 | 21.04 | 21.88 | 19.57 | 21.30 | 19.74  | 19.67 | 21.88  | 19.57 | 20.57 |
| 11 | Benin                  | BEN | 24.97 | 27.16 | 26.48 | 25.38 | 23.38 | 25.51 | 29.78  | 29.79 | 29.79  | 23.38 | 26.55 |
| 12 | Bosnia and Herzegovina | BIH | 17.09 | 19.28 | 17.78 | 18.97 | 11.00 | 17.09 | 17.92  | 17.88 | 19.28  | 11.00 | 17.13 |
| 13 | Brazil                 | BRA | 0.00  | 0.02  | 0.90  | 0.00  | 0.00  | 0.00  | 0.00   | 0.00  | 0.90   | 0.00  | 0.12  |
| 14 | Bulgaria               | BGR | 24.59 | 24.28 | 25.27 | 22.78 | 25.70 | 24.90 | 25.23  | 25.42 | 25.70  | 22.78 | 24.77 |
| 15 | Burkina Faso           | BFA | 40.84 | 41.14 | 42.68 | 45.75 | 45.59 | 45.59 | 42.57  | 42.24 | 45.75  | 40.84 | 43.30 |
| 16 | Burundi                | BDI | 42.17 | 41.16 | 44.60 | 45.95 | 46.05 | 45.86 | 45.21  | 45.54 | 46.05  | 41.16 | 44.57 |
| 17 | Cambodia               | KHM | 9.34  | 7.95  | 8.33  | 6.90  | 10.22 | 7.58  | 7.09   | 7.36  | 10.22  | 6.90  | 8.10  |
| 18 | Cape Verde             | CPV | 0.21  | 0.00  | 17.95 | 1.52  | 1.73  | 0.87  | 0.00   | 0.00  | 17.95  | 0.00  | 2.78  |
| 19 | China                  | CHN | 0.00  | 0.00  | 0.00  | 0.00  | 0.00  | 0.01  | 0.00   | 0.00  | 0.01   | 0.00  | 0.00  |
| 20 | Comoros                | COM | 0.00  | 8.14  | 0.00  | 8.84  | 13.07 | 0.00  | 13.36  | 25.11 | 25.11  | 0.00  | 8.56  |
| 21 | Croatia                | HRV | 14.29 | 15.88 | 14.98 | 14.36 | 9.95  | 14.48 | 15.46  | 15.24 | 15.88  | 9.95  | 14.33 |
| 22 | Cuba                   | CUB | 26.86 | 26.12 | 28.14 | 29.08 | 26.77 | 26.74 | 25.50  | 26.48 | 29.08  | 25.50 | 26.96 |
| 23 | Cyprus                 | CYP | 0.00  | 0.00  | 18.50 | 0.01  | 1.71  | 17.96 | 19.61  | 19.37 | 19.61  | 0.00  | 9.65  |
| 24 | Czech Republic         | CZE | 29.89 | 28.30 | 30.28 | 29.58 | 30.90 | 30.14 | 29.77  | 29.54 | 30.90  | 28.30 | 29.80 |
| 25 | Denmark                | DNK | 42.40 | 42.28 | 42.33 | 42.35 | 42.10 | 42.49 | 42.34  | 42.28 | 42.49  | 42.10 | 42.32 |
| 26 | Dominican Republic     | DOM | 27.73 | 27.21 | 29.55 | 30.26 | 27.35 | 28.11 | 26.51  | 27.80 | 30.26  | 26.51 | 28.07 |
| 27 | East Timor             | TLS | 33.78 | 34.01 | 33.55 | 34.11 | 35.70 | 34.07 | 35.18  | 35.35 | 35.70  | 33.55 | 34.47 |
| 28 | El Salvador            | SLV | 44.60 | 43.30 | 45.08 | 46.53 | 42.10 | 43.87 | 40.06  | 43.05 | 46.53  | 40.06 | 43.58 |

|    |                   |      |       |       |       |       |       |       |       |       |       |       |       |
|----|-------------------|------|-------|-------|-------|-------|-------|-------|-------|-------|-------|-------|-------|
| 29 | Equatorial Guinea | GNQ  | 0.00  | 0.00  | 0.00  | 0.06  | 0.01  | 0.00  | 0.00  | 0.00  | 0.06  | 0.00  | 0.01  |
| 30 | Estonia           | EST  | 12.77 | 12.48 | 18.30 | 15.87 | 19.06 | 16.53 | 18.14 | 18.01 | 19.06 | 12.48 | 16.40 |
| 31 | Fiji              | FJI  | 3.28  | 5.10  | 3.73  | 4.88  | 9.24  | 3.18  | 6.59  | 7.06  | 9.24  | 3.18  | 5.38  |
| 32 | France            | FRA  | 33.20 | 32.94 | 34.96 | 32.75 | 35.16 | 33.96 | 34.21 | 34.14 | 35.16 | 32.75 | 33.91 |
| 33 | Gambia            | GMB  | 47.05 | 47.18 | 47.23 | 47.77 | 47.51 | 47.77 | 47.69 | 48.06 | 48.06 | 47.05 | 47.53 |
| 34 | Gaza              | Gaza | 46.20 | 46.70 | 45.29 | 46.38 | 46.68 | 47.64 | 45.95 | 48.20 | 48.20 | 45.29 | 46.63 |
| 35 | Georgia           | GEO  | 2.63  | 3.88  | 2.82  | 2.61  | 3.46  | 3.08  | 2.77  | 3.26  | 3.88  | 2.61  | 3.07  |
| 36 | Germany           | DEU  | 19.55 | 18.81 | 21.03 | 19.62 | 20.56 | 20.42 | 19.66 | 19.57 | 21.03 | 18.81 | 19.90 |
| 37 | Ghana             | GHA  | 23.02 | 23.69 | 23.34 | 25.15 | 25.03 | 25.72 | 28.17 | 30.06 | 30.06 | 23.02 | 25.52 |
| 38 | Greece            | GRC  | 9.46  | 9.00  | 14.18 | 10.14 | 15.47 | 12.04 | 12.45 | 12.52 | 15.47 | 9.00  | 11.91 |
| 39 | Guam              | GUM  | 94.65 | 94.89 | 97.70 | 91.38 | 96.68 | 97.83 | 49.70 | 49.24 | 97.83 | 49.24 | 84.01 |
| 40 | Guinea Bissau     | GNB  | 2.25  | 6.61  | 4.62  | 0.86  | 1.48  | 4.33  | 7.12  | 7.81  | 7.81  | 0.86  | 4.39  |
| 41 | Haiti             | HTI  | 0.00  | 0.00  | 7.58  | 9.33  | 7.74  | 9.43  | 0.00  | 6.49  | 9.43  | 0.00  | 5.07  |
| 42 | Hungary           | HUN  | 36.82 | 36.60 | 35.69 | 36.13 | 36.48 | 36.01 | 36.39 | 36.29 | 36.82 | 35.69 | 36.30 |
| 43 | India             | IND  | 32.36 | 32.43 | 32.97 | 34.34 | 34.62 | 32.32 | 34.81 | 35.20 | 35.20 | 32.32 | 33.63 |
| 44 | Indonesia         | IDN  | 0.00  | 0.00  | 0.00  | 0.70  | 0.71  | 1.35  | 0.52  | 0.48  | 1.35  | 0.00  | 0.47  |
| 45 | Iran              | IRN  | 0.00  | 0.00  | 5.71  | 0.00  | 0.00  | 0.00  | 0.00  | 0.00  | 5.71  | 0.00  | 0.71  |
| 46 | Ireland           | IRL  | 0.00  | 0.00  | 0.00  | 0.00  | 7.34  | 0.00  | 0.00  | 0.00  | 7.34  | 0.00  | 0.92  |
| 47 | Italy             | ITA  | 29.03 | 28.74 | 31.23 | 28.74 | 32.21 | 30.37 | 30.60 | 30.61 | 32.21 | 28.74 | 30.19 |
| 48 | Ivory Coast       | CIV  | 22.91 | 25.53 | 23.32 | 22.09 | 21.50 | 22.79 | 24.84 | 24.33 | 25.53 | 21.50 | 23.41 |
| 49 | Jamaica           | JAM  | 14.09 | 15.16 | 20.77 | 19.19 | 12.68 | 16.06 | 16.96 | 16.28 | 20.77 | 12.68 | 16.40 |
| 50 | Japan             | JPN  | 12.67 | 12.42 | 12.97 | 10.45 | 18.10 | 14.35 | 14.60 | 15.82 | 18.10 | 10.45 | 13.92 |
| 51 | Kosovo            | KOS  | 10.17 | 11.58 | 10.57 | 9.59  | 7.86  | 9.88  | 10.72 | 10.40 | 11.58 | 7.86  | 10.10 |
| 52 | Kyrgyzstan        | KGZ  | 0.00  | 0.00  | 3.67  | 0.00  | 0.00  | 4.69  | 17.65 | 18.34 | 18.34 | 0.00  | 5.54  |
| 53 | Latvia            | LVA  | 17.96 | 17.63 | 23.76 | 7.28  | 25.01 | 17.95 | 24.36 | 24.41 | 25.01 | 7.28  | 19.79 |
| 54 | Lebanon           | LBN  | 27.89 | 27.51 | 27.39 | 27.98 | 29.53 | 28.64 | 29.41 | 33.35 | 33.35 | 27.39 | 28.96 |

|    |                          |     |       |        |       |       |       |       |       |       |        |       |       |
|----|--------------------------|-----|-------|--------|-------|-------|-------|-------|-------|-------|--------|-------|-------|
| 55 | Lesotho                  | LSO | 8.25  | 19.33  | 28.02 | 39.18 | 38.97 | 37.43 | 29.64 | 24.47 | 39.18  | 8.25  | 28.16 |
| 56 | Liberia                  | LBR | 23.57 | 23.45  | 24.08 | 24.56 | 24.18 | 25.02 | 26.30 | 26.92 | 26.92  | 23.45 | 24.76 |
| 57 | Lithuania                | LTU | 38.35 | 37.82  | 39.84 | 32.72 | 40.14 | 38.87 | 40.00 | 40.05 | 40.14  | 32.72 | 38.47 |
| 58 | Luxembourg               | LUX | 6.99  | 7.38   | 19.02 | 5.85  | 20.02 | 14.39 | 16.83 | 16.99 | 20.02  | 5.85  | 13.43 |
| 59 | Macedonia                | MKD | 7.02  | 6.58   | 6.88  | 5.88  | 5.13  | 6.18  | 6.95  | 6.60  | 7.02   | 5.13  | 6.40  |
| 60 | Malawi                   | MWI | 40.78 | 40.85  | 40.66 | 40.30 | 40.80 | 41.39 | 41.48 | 40.80 | 41.48  | 40.30 | 40.88 |
| 61 | Malaysia                 | MYS | 0.05  | 1.88   | 0.00  | 0.00  | 0.00  | 0.00  | 0.00  | 0.00  | 1.88   | 0.00  | 0.24  |
| 62 | Mauritius                | MUS | 2.85  | 2.62   | 3.08  | 2.83  | 2.91  | 3.40  | 3.60  | 2.90  | 3.60   | 2.62  | 3.02  |
| 63 | Moldova                  | MDA | 48.53 | 48.50  | 48.64 | 48.52 | 48.54 | 48.60 | 48.52 | 48.61 | 48.64  | 48.50 | 48.56 |
| 64 | Montenegro               | MNE | 1.07  | 25.38  | 2.45  | 19.00 | 0.00  | 3.97  | 17.44 | 8.54  | 25.38  | 0.00  | 9.73  |
| 65 | Myanmar                  | MMR | 2.38  | 4.18   | 2.89  | 3.63  | 7.44  | 2.46  | 5.56  | 6.02  | 7.44   | 2.38  | 4.32  |
| 66 | Nepal                    | NPL | 1.64  | 5.49   | 3.44  | 3.44  | 4.63  | 1.14  | 10.16 | 8.00  | 10.16  | 1.14  | 4.74  |
| 67 | Netherlands              | NLD | 11.75 | 9.50   | 13.43 | 9.77  | 14.31 | 12.94 | 9.90  | 11.30 | 14.31  | 9.50  | 11.61 |
| 68 | New Caledonia            | NCL | 0.00  | 1.13   | 0.00  | 0.00  | 0.00  | 0.00  | 0.00  | 0.00  | 1.13   | 0.00  | 0.14  |
| 69 | Nigeria                  | NGA | 48.03 | 48.75  | 47.21 | 46.77 | 47.24 | 47.77 | 47.49 | 47.39 | 48.75  | 46.77 | 47.58 |
| 70 | North Korea              | PRK | 14.73 | 15.74  | 15.22 | 15.88 | 26.38 | 15.35 | 20.33 | 21.67 | 26.38  | 14.73 | 18.16 |
| 71 | Northern Cyprus          | CYN | 0.00  | 100.00 | 94.27 | 98.88 | 99.39 | 96.36 | 92.64 | 95.63 | 100.00 | 0.00  | 84.65 |
| 72 | Northern Mariana Islands | MNP | 43.38 | 37.76  | 43.14 | 42.86 | 42.86 | 42.86 | 35.98 | 35.98 | 43.38  | 35.98 | 40.61 |
| 73 | Pakistan                 | PAK | 0.00  | 0.00   | 0.34  | 0.00  | 0.00  | 0.00  | 0.00  | 0.00  | 0.34   | 0.00  | 0.04  |
| 74 | Paraguay                 | PRY | 0.00  | 0.00   | 5.75  | 0.88  | 0.22  | 3.51  | 6.25  | 5.43  | 6.25   | 0.00  | 2.76  |
| 75 | Philippines              | PHL | 20.31 | 20.23  | 19.75 | 21.28 | 27.38 | 21.13 | 25.09 | 25.84 | 27.38  | 19.75 | 22.63 |
| 76 | Poland                   | POL | 37.40 | 37.09  | 37.83 | 37.15 | 38.05 | 37.77 | 38.07 | 38.11 | 38.11  | 37.09 | 37.68 |
| 77 | Portugal                 | PRT | 29.28 | 27.98  | 31.91 | 29.18 | 32.63 | 30.15 | 30.95 | 31.38 | 32.63  | 27.98 | 30.43 |
| 78 | Puerto Rico              | PRI | 6.50  | 4.93   | 3.82  | 12.50 | 10.18 | 12.29 | 0.00  | 0.92  | 12.50  | 0.00  | 6.39  |
| 79 | Qatar                    | QAT | 14.16 | 11.72  | 9.75  | 18.78 | 36.42 | 9.97  | 10.21 | 48.09 | 48.09  | 9.75  | 19.89 |
| 80 | Republic of Serbia       | SRB | 30.51 | 30.41  | 30.64 | 29.11 | 28.92 | 29.87 | 31.55 | 30.28 | 31.55  | 28.92 | 30.16 |

|     |                             |     |       |       |       |       |       |       |       |       |       |       |       |
|-----|-----------------------------|-----|-------|-------|-------|-------|-------|-------|-------|-------|-------|-------|-------|
| 81  | Romania                     | ROU | 20.17 | 19.87 | 21.58 | 18.55 | 22.11 | 20.37 | 21.92 | 22.02 | 22.11 | 18.55 | 20.82 |
| 82  | Rwanda                      | RWA | 30.84 | 30.87 | 31.51 | 32.35 | 32.53 | 32.53 | 32.61 | 32.90 | 32.90 | 30.84 | 32.02 |
| 83  | Saint Kitts and Nevis       | KNA | 22.67 | 19.91 | 19.96 | 20.27 | 21.32 | 19.35 | 17.59 | 21.78 | 22.67 | 17.59 | 20.36 |
| 84  | Samoa                       | WSM | 2.65  | 3.84  | 4.63  | 2.97  | 8.99  | 3.73  | 5.46  | 2.03  | 8.99  | 2.03  | 4.29  |
| 85  | Sao Tome and Principe       | STP | 45.85 | 50.77 | 48.15 | 31.21 | 36.30 | 39.09 | 30.87 | 28.48 | 50.77 | 28.48 | 38.84 |
| 86  | Senegal                     | SEN | 5.92  | 7.00  | 7.47  | 8.69  | 10.74 | 9.59  | 9.66  | 9.86  | 10.74 | 5.92  | 8.62  |
| 87  | Sierra Leone                | SLE | 37.15 | 37.97 | 37.39 | 37.64 | 37.56 | 38.08 | 39.47 | 39.75 | 39.75 | 37.15 | 38.13 |
| 88  | Singapore                   | SGP | 0.00  | 0.00  | 0.00  | 51.04 | 0.00  | 0.00  | 0.00  | 0.00  | 51.04 | 0.00  | 6.38  |
| 89  | Slovakia                    | SVK | 13.48 | 12.37 | 13.52 | 13.28 | 14.03 | 13.60 | 13.10 | 13.35 | 14.03 | 12.37 | 13.34 |
| 90  | Slovenia                    | SVN | 19.75 | 19.47 | 21.94 | 20.23 | 21.33 | 21.01 | 21.30 | 22.12 | 22.12 | 19.47 | 20.89 |
| 91  | South Korea                 | KOR | 35.36 | 35.41 | 37.23 | 37.28 | 37.80 | 36.29 | 37.35 | 36.91 | 37.80 | 35.36 | 36.70 |
| 92  | Spain                       | ESP | 4.65  | 4.84  | 5.92  | 4.49  | 6.16  | 5.20  | 5.21  | 5.19  | 6.16  | 4.49  | 5.21  |
| 93  | Sri Lanka                   | LKA | 30.15 | 30.27 | 30.21 | 32.21 | 35.51 | 30.38 | 31.46 | 31.08 | 35.51 | 30.15 | 31.41 |
| 94  | Swaziland                   | SWZ | 38.45 | 39.33 | 35.00 | 34.16 | 34.33 | 33.88 | 37.56 | 38.45 | 39.33 | 33.88 | 36.39 |
| 95  | Switzerland                 | CHE | 2.01  | 2.10  | 2.25  | 2.03  | 2.12  | 2.12  | 2.00  | 1.96  | 2.25  | 1.96  | 2.08  |
| 96  | Syria                       | SYR | 0.00  | 0.00  | 3.89  | 0.00  | 0.11  | 0.00  | 0.00  | 0.00  | 3.89  | 0.00  | 0.50  |
| 97  | Thailand                    | THA | 21.69 | 21.51 | 21.94 | 24.19 | 25.82 | 22.00 | 22.89 | 22.87 | 25.82 | 21.51 | 22.86 |
| 98  | Togo                        | TGO | 31.16 | 30.98 | 31.29 | 31.85 | 32.18 | 32.83 | 34.09 | 34.43 | 34.43 | 30.98 | 32.35 |
| 99  | Tonga                       | TON | 34.41 | 33.12 | 32.62 | 39.59 | 45.18 | 40.73 | 45.18 | 45.18 | 45.18 | 32.62 | 39.50 |
| 100 | Trinidad and Tobago         | TTO | 5.43  | 5.09  | 5.55  | 5.76  | 5.47  | 1.23  | 4.75  | 1.23  | 5.76  | 1.23  | 4.31  |
| 101 | Tunisia                     | TUN | 2.11  | 1.67  | 0.32  | 0.30  | 0.00  | 0.00  | 0.00  | 0.00  | 2.11  | 0.00  | 0.55  |
| 102 | Turkey                      | TUR | 22.62 | 22.74 | 24.24 | 23.43 | 21.72 | 23.45 | 22.90 | 23.48 | 24.24 | 21.72 | 23.07 |
| 103 | Uganda                      | UGA | 35.96 | 36.52 | 35.79 | 36.21 | 35.99 | 36.14 | 37.57 | 37.52 | 37.57 | 35.79 | 36.46 |
| 104 | Ukraine                     | UKR | 42.42 | 42.32 | 42.48 | 42.35 | 42.14 | 42.38 | 42.44 | 42.51 | 42.51 | 42.14 | 42.38 |
| 105 | United Kingdom              | GBR | 13.19 | 13.38 | 14.58 | 12.85 | 13.85 | 13.79 | 13.99 | 13.67 | 14.58 | 12.85 | 13.66 |
| 106 | United Republic of Tanzania | TZA | 11.97 | 14.53 | 13.12 | 12.07 | 11.22 | 13.53 | 14.19 | 14.09 | 14.53 | 11.22 | 13.09 |

|     |                              |     |       |       |       |       |       |       |       |       |       |       |       |
|-----|------------------------------|-----|-------|-------|-------|-------|-------|-------|-------|-------|-------|-------|-------|
| 107 | United States Virgin Islands | VIR | 46.04 | 69.32 | 74.63 | 34.04 | 53.66 | 73.34 | 84.03 | 86.23 | 86.23 | 34.04 | 65.16 |
| 108 | Uruguay                      | URY | 0.00  | 0.00  | 0.00  | 0.00  | 0.00  | 0.00  | 1.82  | 0.00  | 1.82  | 0.00  | 0.23  |
| 109 | Vietnam                      | VNM | 26.21 | 23.65 | 24.46 | 20.77 | 27.78 | 22.12 | 21.12 | 21.90 | 27.78 | 20.77 | 23.50 |
| 110 | West Bank                    | PSE | 20.01 | 21.38 | 21.03 | 21.13 | 25.88 | 22.10 | 17.61 | 24.19 | 25.88 | 17.61 | 21.67 |
| 111 | Zimbabwe                     | ZWE | 37.19 | 38.02 | 36.91 | 37.13 | 36.79 | 37.55 | 38.35 | 38.42 | 38.42 | 36.79 | 37.54 |

## Supplementary Table 8

Percentage of cropland losses for countries under shared approach in 2050 at country scale(%)

|    | country             | ISO3 | SSP1_RCP19 | SSP1_RCP26 | SSP2_RCP45 | SSP3_RCP70 | SSP4_RCP34 | SSP4_RCP60 | SSP5_RCP34 | SSP5_RCP85 | max    | min   | mean  |
|----|---------------------|------|------------|------------|------------|------------|------------|------------|------------|------------|--------|-------|-------|
| 1  | Antigua and Barbuda | ATG  | 2.16       | 2.07       | 17.64      | 2.15       | 5.02       | 6.68       | 100.00     | 24.31      | 100.00 | 2.07  | 20.00 |
| 2  | Austria             | AUT  | 10.74      | 10.93      | 12.53      | 10.39      | 11.77      | 11.37      | 10.71      | 10.51      | 12.53  | 10.39 | 11.12 |
| 3  | Azerbaijan          | AZE  | 5.66       | 9.20       | 6.74       | 6.03       | 13.92      | 6.09       | 5.77       | 5.59       | 13.92  | 5.59  | 7.38  |
| 4  | Bangladesh          | BGD  | 40.13      | 39.74      | 39.43      | 39.79      | 41.51      | 39.76      | 40.92      | 41.30      | 41.51  | 39.43 | 40.32 |
| 5  | Barbados            | BRB  | 16.88      | 13.85      | 15.37      | 18.51      | 18.05      | 15.45      | 13.64      | 15.93      | 18.51  | 13.64 | 15.96 |
| 6  | Belarus             | BLR  | 7.56       | 5.93       | 14.17      | 8.64       | 3.57       | 11.79      | 14.30      | 14.29      | 14.30  | 3.57  | 10.03 |
| 7  | Belgium             | BEL  | 25.13      | 22.78      | 20.40      | 18.05      | 18.97      | 20.83      | 22.81      | 22.69      | 25.13  | 18.05 | 21.46 |
| 8  | Bulgaria            | BGR  | 23.96      | 23.65      | 24.45      | 22.50      | 24.82      | 24.23      | 24.35      | 24.53      | 24.82  | 22.50 | 24.06 |
| 9  | Burkina Faso        | BFA  | 33.03      | 32.02      | 38.82      | 43.69      | 43.68      | 43.55      | 38.85      | 38.13      | 43.69  | 32.02 | 38.97 |
| 10 | Burundi             | BDI  | 38.82      | 37.24      | 42.29      | 44.65      | 44.42      | 44.57      | 43.57      | 44.23      | 44.65  | 37.24 | 42.47 |
| 11 | Cuba                | CUB  | 20.97      | 18.60      | 24.31      | 26.28      | 19.26      | 19.08      | 14.99      | 19.47      | 26.28  | 14.99 | 20.37 |
| 12 | Czech Republic      | CZE  | 10.79      | 10.63      | 11.82      | 11.48      | 12.20      | 11.88      | 11.31      | 10.98      | 12.20  | 10.63 | 11.39 |
| 13 | Denmark             | DNK  | 38.19      | 37.14      | 36.59      | 36.14      | 34.27      | 37.32      | 36.72      | 37.10      | 38.19  | 34.27 | 36.68 |
| 14 | Dominican Republic  | DOM  | 12.12      | 11.24      | 16.39      | 19.53      | 12.69      | 14.62      | 7.46       | 11.87      | 19.53  | 7.46  | 13.24 |

|    |                 |      |       |        |       |       |       |       |       |       |        |       |       |
|----|-----------------|------|-------|--------|-------|-------|-------|-------|-------|-------|--------|-------|-------|
| 15 | East Timor      | TLS  | 14.79 | 6.94   | 9.18  | 19.92 | 30.99 | 16.63 | 28.03 | 28.70 | 30.99  | 6.94  | 19.40 |
| 16 | El Salvador     | SLV  | 36.09 | 34.10  | 36.64 | 38.81 | 32.95 | 34.80 | 26.09 | 20.71 | 38.81  | 20.71 | 32.52 |
| 17 | France          | FRA  | 33.10 | 32.90  | 34.02 | 32.75 | 33.42 | 33.46 | 33.51 | 33.43 | 34.02  | 32.75 | 33.32 |
| 18 | Gambia          | GMB  | 37.70 | 37.06  | 38.78 | 42.52 | 41.50 | 41.99 | 43.93 | 45.75 | 45.75  | 37.06 | 41.15 |
| 19 | Gaza            | Gaza | 18.96 | 19.19  | 18.68 | 19.68 | 19.61 | 19.66 | 18.87 | 20.31 | 20.31  | 18.68 | 19.37 |
| 20 | Germany         | DEU  | 6.64  | 6.89   | 7.18  | 7.26  | 6.30  | 7.00  | 6.66  | 6.67  | 7.26   | 6.30  | 6.83  |
| 21 | Ghana           | GHA  | 4.16  | 3.90   | 5.80  | 11.00 | 10.95 | 11.38 | 17.19 | 20.09 | 20.09  | 3.90  | 10.56 |
| 22 | Hungary         | HUN  | 31.12 | 27.12  | 26.28 | 26.33 | 29.00 | 27.29 | 26.85 | 26.99 | 31.12  | 26.28 | 27.62 |
| 23 | India           | IND  | 27.09 | 27.26  | 28.22 | 30.56 | 30.94 | 27.20 | 31.36 | 31.94 | 31.94  | 27.09 | 29.32 |
| 24 | Italy           | ITA  | 20.59 | 20.45  | 22.04 | 20.76 | 21.58 | 21.28 | 21.20 | 21.18 | 22.04  | 20.45 | 21.13 |
| 25 | Ivory Coast     | CIV  | 3.85  | 3.77   | 4.60  | 6.34  | 6.64  | 7.10  | 10.04 | 11.13 | 11.13  | 3.77  | 6.68  |
| 26 | Japan           | JPN  | 0.00  | 0.00   | 0.00  | 0.00  | 5.68  | 0.00  | 0.00  | 0.00  | 5.68   | 0.00  | 0.71  |
| 27 | Kosovo          | KOS  | 4.85  | 4.50   | 4.99  | 1.22  | 0.00  | 3.08  | 4.16  | 3.83  | 4.99   | 0.00  | 3.33  |
| 28 | Lebanon         | LBN  | 20.89 | 22.08  | 18.74 | 22.96 | 24.01 | 23.68 | 19.69 | 13.39 | 24.01  | 13.39 | 20.68 |
| 29 | Lesotho         | LSO  | 0.00  | 0.00   | 0.00  | 14.97 | 23.05 | 11.66 | 0.00  | 0.00  | 23.05  | 0.00  | 6.21  |
| 30 | Liberia         | LBR  | 5.15  | 5.19   | 7.96  | 13.17 | 12.55 | 13.11 | 17.67 | 20.29 | 20.29  | 5.15  | 11.89 |
| 31 | Lithuania       | LTU  | 36.16 | 33.54  | 35.34 | 25.80 | 35.45 | 36.19 | 35.10 | 35.18 | 36.19  | 25.80 | 34.09 |
| 32 | Luxembourg      | LUX  | 6.58  | 6.88   | 16.18 | 4.76  | 10.35 | 12.22 | 14.09 | 14.68 | 16.18  | 4.76  | 10.72 |
| 33 | Malawi          | MWI  | 17.90 | 16.15  | 19.88 | 21.42 | 22.50 | 22.55 | 23.60 | 24.20 | 24.20  | 16.15 | 21.03 |
| 34 | Moldova         | MDA  | 49.84 | 49.41  | 50.18 | 48.75 | 49.00 | 49.29 | 48.97 | 49.06 | 50.18  | 48.75 | 49.31 |
| 35 | Netherlands     | NLD  | 1.87  | 1.97   | 2.48  | 1.62  | 2.44  | 2.30  | 1.40  | 2.42  | 2.48   | 1.40  | 2.06  |
| 36 | Nigeria         | NGA  | 34.61 | 33.70  | 36.32 | 38.16 | 39.25 | 39.51 | 39.29 | 39.85 | 39.85  | 33.70 | 37.59 |
| 37 | North Korea     | PRK  | 0.00  | 0.00   | 0.00  | 0.00  | 20.05 | 0.00  | 9.14  | 11.26 | 20.05  | 0.00  | 5.06  |
| 38 | Northern Cyprus | CYN  | 0.00  | 100.00 | 94.27 | 98.88 | 99.39 | 96.36 | 92.64 | 95.63 | 100.00 | 0.00  | 84.65 |
| 39 | Philippines     | PHL  | 0.14  | 0.00   | 0.00  | 3.18  | 20.12 | 2.51  | 14.67 | 16.33 | 20.12  | 0.00  | 7.12  |
| 40 | Poland          | POL  | 36.82 | 36.34  | 37.10 | 36.18 | 37.46 | 37.07 | 37.56 | 37.62 | 37.62  | 36.18 | 37.02 |



|    |                       |     |       |       |       |       |       |       |       |       |       |       |       |
|----|-----------------------|-----|-------|-------|-------|-------|-------|-------|-------|-------|-------|-------|-------|
| 41 | Portugal              | PRT | 6.90  | 4.41  | 14.79 | 7.74  | 16.58 | 11.07 | 11.61 | 11.94 | 16.58 | 4.41  | 10.63 |
| 42 | Republic of Serbia    | SRB | 30.37 | 30.06 | 30.46 | 28.57 | 28.79 | 29.55 | 31.55 | 29.94 | 31.55 | 28.57 | 29.91 |
| 43 | Romania               | ROU | 14.41 | 14.38 | 14.95 | 13.97 | 14.98 | 14.39 | 15.14 | 15.18 | 15.18 | 13.97 | 14.68 |
| 44 | Rwanda                | RWA | 29.29 | 29.25 | 30.32 | 31.56 | 31.74 | 31.73 | 31.82 | 32.14 | 32.14 | 29.25 | 30.98 |
| 45 | Saint Kitts and Nevis | KNA | 0.00  | 19.91 | 0.00  | 20.27 | 0.00  | 0.00  | 0.00  | 0.00  | 20.27 | 0.00  | 5.02  |
| 46 | Sierra Leone          | SLE | 23.15 | 23.88 | 25.55 | 29.59 | 29.56 | 29.21 | 32.60 | 34.01 | 34.01 | 23.15 | 28.45 |
| 47 | Singapore             | SGP | 0.00  | 0.00  | 0.00  | 51.04 | 0.00  | 0.00  | 0.00  | 0.00  | 51.04 | 0.00  | 6.38  |
| 48 | Slovakia              | SVK | 7.18  | 6.61  | 7.43  | 7.56  | 7.69  | 7.68  | 7.47  | 7.71  | 7.71  | 6.61  | 7.42  |
| 49 | Slovenia              | SVN | 19.46 | 18.33 | 20.82 | 19.98 | 20.64 | 20.33 | 20.61 | 20.75 | 20.82 | 18.33 | 20.12 |
| 50 | South Korea           | KOR | 34.05 | 33.90 | 36.10 | 36.25 | 37.07 | 35.13 | 35.90 | 35.91 | 37.07 | 33.90 | 35.54 |
| 51 | Sri Lanka             | LKA | 11.28 | 9.90  | 10.63 | 20.88 | 26.09 | 13.27 | 17.39 | 17.20 | 26.09 | 9.90  | 15.83 |
| 52 | Swaziland             | SWZ | 0.00  | 0.00  | 0.00  | 21.44 | 19.30 | 17.68 | 17.13 | 20.86 | 21.44 | 0.00  | 12.05 |
| 53 | Switzerland           | CHE | 2.01  | 2.10  | 2.25  | 2.03  | 2.10  | 2.12  | 2.00  | 1.96  | 2.25  | 1.96  | 2.07  |
| 54 | Thailand              | THA | 16.38 | 15.96 | 16.38 | 20.67 | 23.03 | 16.94 | 18.60 | 18.66 | 23.03 | 15.96 | 18.33 |
| 55 | Togo                  | TGO | 0.00  | 0.00  | 0.00  | 4.94  | 4.34  | 5.84  | 12.23 | 14.18 | 14.18 | 0.00  | 5.19  |
| 56 | Trinidad and Tobago   | TTO | 5.43  | 5.09  | 5.55  | 5.76  | 5.47  | 1.23  | 4.75  | 1.13  | 5.76  | 1.13  | 4.30  |
| 57 | Turkey                | TUR | 0.00  | 0.00  | 1.91  | 0.68  | 0.00  | 0.00  | 0.00  | 0.00  | 1.91  | 0.00  | 0.32  |
| 58 | Uganda                | UGA | 6.32  | 5.01  | 9.98  | 13.43 | 13.69 | 13.62 | 15.53 | 16.90 | 16.90 | 5.01  | 11.81 |
| 59 | Ukraine               | UKR | 39.70 | 38.77 | 40.02 | 37.72 | 38.00 | 38.54 | 38.58 | 38.48 | 40.02 | 37.72 | 38.73 |
| 60 | United Kingdom        | GBR | 13.19 | 13.38 | 14.58 | 12.85 | 13.85 | 13.79 | 13.99 | 13.67 | 14.58 | 12.85 | 13.66 |
| 61 | Vietnam               | VNM | 7.58  | 0.00  | 5.07  | 0.00  | 12.03 | 0.00  | 0.00  | 0.00  | 12.03 | 0.00  | 3.09  |
| 62 | West Bank             | PSE | 11.97 | 11.82 | 12.06 | 12.50 | 14.86 | 12.65 | 12.23 | 17.97 | 17.97 | 11.82 | 13.26 |
| 63 | Zimbabwe              | ZWE | 0.00  | 0.00  | 0.00  | 0.90  | 0.01  | 1.15  | 9.38  | 13.17 | 13.17 | 0.00  | 3.08  |
